# Supplementary material
Source: publisher figshare collection journal article supplement (https://gsapubs.figshare.com/ndownloader/files/31534289)
Supplement: Supplementary file 1 [file 31534289]

## Sheet: Table S1 - Popo timescales
TABLE S1: FE-MG DIFFUSION DATA AND TIMESCALE DENSITIES FOR ORTHOPYROXENES FROM ERUPTIONS OF POPOCATEPETL
Eruption	Sample	Crystal	Type*	Recharge episode #	Boundary modeled†	Mg# band/rim	T (°C)$	1 SD	Time since event (yr)	1 SD	Time since event (d)	1 SD	timescale density#
Pink Pumice	POP-112 250-500 um	22	T1a	7	core - rim	73.6093	983.7	17.3	0.0218237	0.0103049	7.97	3.76
	POP-112 125-250 um	18	T2	7	band - rim	74.1	981.8	17.5	0.0396468	0.0211116	14.5	7.71	490.498
	POP-112 125-250 um	43	T2	7	core - band	75.6	1043.5	30.8	0.0508161	0.0424088	18.5	15.5	782.698
	POP-112 125-250 um	11	T2	7	band - rim	77.5	997.1	24	0.0597354	0.0424574	21.8	15.5	980.142
	POP-112 125-250 um	38	T2	7	core - rim	79.8	1041.7	23.2	0.0601738	0.0306803	22	11.2	19942.2
	POP-112 250-500 um	16	T1a	7	core - rim	76.4	988.9	25.1	0.0722342	0.0457787	26.4	16.7	724.867
	POP-112 125-250 um	34	T1b	7	core - band	76.9	994	27.3	0.0753187	0.0483506	27.5	17.6	2834.27
	POP-112 250-500 um	20	T2	7	band - rim	64.6868	950	20	0.0787418	0.0535288	28.7	19.5	2553.86
	POP-112 125-250 um	39	T2	6	core - rim	82.2	1041.5	26.2	0.14643	0.0837235	53.4	30.6	129.154
	POP-112 250-500 um	23	T2	6	band - rim	71.4156	974.8	17.2	0.150771	0.0647628	55	23.6	2013.56
	POP-112 250-500 um	26	T1a	6	band - rim	73.0842	1001.1	18.3	0.158568	0.0779838	57.9	28.5	1121.26
	POP-112 250-500 um	19	T1b	6	light band - dark band	80.2174	1030.1	23.9	0.19954	0.110435	72.8	40.3	213.371
	POP-112 125-250 um	7	T2	6	band - rim	74.5	996.6	17.4	0.264579	0.109431	96.6	39.9	134.414
	POP-112 125-250 um	4	T2	6	band - rim	83.8025	1049.2	27.6	0.308435	0.185555	113	67.7	199.34
	POP-112 250-500 um	27	T2	6	band - rim	70.1842	970.8	16.6	0.313068	0.152228	114	55.6	1886.7
	POP-112 125-250 um	36	T1a	5	core - rim	71.7	980.8	16.8	0.561528	0.278965	205	102	35.1856
	POP-112 125-250 um	27	T1a	5	core - band	72.6	969.6	16.2	0.580815	0.231328	212	84.4	453.269
	POP-112 125-250 um	22	T1a	5	core - band		multiple		0.61817	0.3442	226	126	234.026
	POP-112 125-250 um	31	T1a	5	core - rim	71.5	966.1	16.4	0.643003	0.263266	235	96.1	352.035
	POP-112 125-250 um	33	T1a	5	core - band	71.6	986.4	19	0.793749	0.356671	290	130	57.9928
	POP-112 125-250 um	42	T1b	5	core - band	76.5	984.9	15.8	0.938191	0.523573	342	191	60.5241
	POP-112 125-250 um	11	T2	5	dark band - light band	77.5	997.1	24	0.94974	0.528513	347	193	756.943
	POP-112 125-250 um	37	T1a	5	core - osc. rim	70.9	966.2	16	1.05856	0.426286	386	156	80.3395
	POP-112 250-500 um	21	T1a	5	core - rim	70.0733	968	19	1.28095	0.627382	468	229	39.3096
	POP-112 125-250 um	25	T1b	4/5	core - rim	72.2	979.514	16.5267	1.70246	0.698755	621	255	20.7399
	POP-112 125-250 um	24	T1b	4	band - rim	71.8	984	13	3.71306	1.54123	1360	563	4.34805
	POP-112 125-250 um	29	T2	4	core - band	72.6	971.1	15.7	3.73824	1.42713	1360	521	347.269
	POP-112 250-500 um	1	T1b	4	core - band		multiple		5.4826	2.5052	2000	914	5.01169
	POP-112 250-500 um	10	T1b	4	core - band	77.178	994.4	26.9	8.61543	5.36118	3140	1960	2.7905
	POP-112 250-500 um	9	T2	3	core - band	n.a.	950	20	12.5618	6.35714	4590	2320	2.21525
	POP-112 125-250 um	7	T2	3	core - band		multiple		21.711	11.0825	7920	4050	0.955513
	POP-112 250-500 um	20	T2	3	core - band	64.6868	950	20	34.9985	17.3674	12800	6340	0.657925
	POP-112 250-500 um	23	T2	2	core - band		multiple		89.9406	44.63	32800	16300	0.159116
	POP-112 125-250 um	5	T2	2	core - band	n.a.	950	20	105.427	52.6262	38500	19200	0.564511
	POP-112 250-500 um	27	T2	2	core - band		multiple		106.745	53.3514	39000	19500	6.63085
	POP-112 125-250 um	26	T2	2	core - band	64	950	20	138.438	68.6614	50500	25100	0.275845
	POP-112 125-250 um	30	T2	1	core - band	63.7	950	20	323.483	161.3	118000	58900	0.0472436
Nealticán	POP_80_2_TS	4	1a	3	core - band	81.9	1062.9	28.6	0.134247	0.079726	49	29.1
	POP-101_TS	11	1b	3	core - band	75.7	984.5	20	0.216712	0.104932	79.1	38.3	51.022
	POP-99_TS	5	1a	3	core - band	81	1036.2	26.6	0.269315	0.155616	98.3	56.8	79.9876
	POP_80_2_TS	14	1a	3	core - band	80.8	1028.8	25.3	0.29863	0.164932	109	60.2	143.529
	POP-11_TS	24	1b	3	core - band	81.4	1035.2	27	0.334247	0.195342	122	71.3	118.136
	POP-99_TS	8	1b	3	core - band	81.7	1039.6	27.7	0.347945	0.207945	127	75.9	307.152
	POP-101_TS	3	1b	3	core - band	74.8	975	17.5	0.391781	0.169041	143	61.7	95.9851
	POP-99_TS	4	1a	3	core - band	82.4	1051.6	29.9	0.391781	0.249041	143	90.9
	POP-99_TS	10	1b	2	core - band	77.7	1007.6	27.8	1.11781	0.70411	408	257	5.79533
	POP-80_2_TS	11	1b	2	light band - dark band	76	986.1	20.8	1.39178	0.690411	508	252	15.3576
	POP-99_TS	1	2	2	core - rim	67.7	950	20	2.43836	1.57808	890	576	4.02032
	POP-101_TS	4	1b	2	light band - dark band	65	950	20	3.28767	1.69863	1200	620	4.95407
	POP-11_TS	6	1b	2	core - band	86.2	1069	39.7	4.54795	3.75342	1660	1370	3.33861
	POP-80_2_TS	2	2	1/2	core - rim	60.2	950	20	5.80822	2.90411	2120	1060	3.33861
	POP-101_TS	7	2	1	core - rim	55.4	950	20	34.5205	17.1781	12600	6270	0.146542
	POP-99_TS	7	1b	1	core - band	62	950	20	37.2603	18.5479	13600	6770	1.53576
	POP-101_TS	5	2	1	core - band	58.3	950	20	40.8219	20.274	14900	7400	1.18136
	POP-101_TS	13	2	1	core - band	56.8	950	20	46.5753	23.1233	17000	8440	0.731315
	POP-80_2_TS	3	2	1	core - band	61.4	950	20	60.5479	30.137	22100	11000	0.30113
	POP-101_TS	14	2	1	core - band	57.5	950	20	62.7397	31.2329	22900	11400	1.9197
	POP-101_TS	10	1b	1	band - rim	59.1	950	20	88.4932	43.8356	32300	16000	0.163379
Yellow Pumice	POP-63 125-250 um	22	1b	5	band - rim	67.8	974.1	15.1	0.0543899	0.0214754	19.9	7.84
	POP-63 125-250 um	15	1b	4	core - rim	69.6	964.5	16.7	0.827931	0.390585	302	143	5.53807
	POP-113 250-500 um	9	1b	4	core - band		multiple		0.900419	0.628847	329	230	59.0984
	POP-113 125-250 um	27_a	1a	4	core - rim	70.1	986.6	15.6	0.944845	0.354934	345	130	96.4269
	POP-113 125-250 um	27_b	1b	3	core-rim	71.3	973.6	16.3	2.03952	0.812536	744	297	3.91343
	POP-113 125-250 um	6	1b	3	core - band		multiple		2.318	1.33059	846	486	15.383
	POP-113 125-250 um	29	T2	3	core - rim	71.2	984.8	15.9	2.50249	0.936475	913	342	23.2202
	POP-113 250-500 um	18	T2	3	band - rim	67.8	971.9	14.9	3.03668	1.12103	1110	409	8.01945
	POP-113 250-500 um	3	1b	3	core - band	75.2	961.1	19.7	3.39353	1.6655	1240	608	12.0048
	POP-113 250-500 um	21	1a	2/3	core - band		multiple		5.48665	3.65188	2000	1330	2.04667
	POP-113 250-500 um	7	1b	2	core - band	76.3	984	23.4	7.56753	4.17862	2760	1530	2.05871
	POP-113 125-250 um	17	1b	2	band - rim	69.5	980.5	16.3	8.66003	3.4272	3160	1250	2.22554
	POP-113 250-500 um	8	1b	2	core - band		multiple		11.8738	4.91297	4330	1790	0.756556
	POP-113 125-250 um	32	T2	2	core - rim	71.4	970.9	14.9	12.1523	4.35318	4440	1590	8.73033
	POP-63 125-250 um	13	1b	2	core - band	67.3	950	20	14.1283	7.09678	5160	2590	1.23051
	POP-63 125-250 um	23	T2	2	core - rim	72.6	967.2	15.5	14.2753	5.48179	5210	2000	16.5339
	POP-113 125-250 um	28	1a	2	core - rim	71.2	969.5	14.9	15.0184	5.4186	5480	1980	3.27198
	POP-63 125-250 um	5	1b	2	core - band		multiple		17.4822	7.34279	6380	2680	0.986875
	POP-113 125-250 um	14	T2	2	core - band	62.2	950	20	23.2191	11.5531	8480	4220	0.423817
	POP-63 125-250 um	27	1b	1	core - band	72.4	966.5	15.6	46.1277	17.5179	16800	6390	0.187
	POP-63 250-500 um	12	T2	1	core - rim	69.5	963.6	15.6	90.0167	34.0628	32900	12400	0.0553992
Pumice with Andeste	POP51_WS	7	2	5	core - rim	78.5	973	22	0.871233	0.460274	318	168
	POP61_250-500	24	1B	4	core - rim	78	976	23	3.18082	1.8	1161	657	13.4699
	POP59Y_500-1000	3	2	3	core - rim	82.3	982	23	12.9041	7.06849	4710	2580	3.19953
	POP61Y_WS	30	2	3	core - rim	77	976	23	13.6438	7.75342	4980	2830	42.056
	POP51_500-1000	12	1B	3	core - band	85.8	1021	27	13.7808	8.21918	5030	3000	227.103
	POP61_250-500	3	2	3	core - rim	79	977	24	19.9726	11.5068	7290	4200	5.02439
	POP61_250-500	14	2	3	core - band		multiple		22.3014	11.0959	8140	4050	13.359
	POP51_500-1000	1	2	2	core - rim	75.3	978	21	42.7397	21.3151	15600	7780	1.52213
	POP59Y_500-1000	1	1A	2	core - band		multiple		56.7123	28.2192	20700	10300	2.2265
	POP61_250-500	20	2	2	core - rim	77	976	23	65.4795	36.1644	23900	13200	3.54848
	POP51_500-1000	17	2	2	core - rim	77.6	979	22	66.3014	35.0685	24200	12800	37.8504
	POP61_250-500	1	2	2	core - rim	77	976	22	72.3288	29.589	26400	10800	5.16142
	POP51_500-1000	4	2	1/2	core - rim	77	975	22	143.836	122.192	52500	44600	0.435062
	POP61_250-500	6	2	1	core - band		multiple		199.726	118.356	72900	43200	0.556624
	POP51_500-1000	19	2	1	core - rim	75	975	21	229.315	114.795	83700	41900	1.0514
	POP51_500-1000	7	1A	1	core - rim	75.5	972	21	498.63	250.959	182000	91600	0.115515
El Fraile	PG 39 -1_WS	18	T1a	3	core - rim	83.4	972	20	0.419178	0.250137	153	91.3
	PG 39 -1_WS	8	T2	3	core - band		multiple		0.449315	0.290411	164	106	48.8024
	PG 39 -1_WS	40	T1a	3	core - band	81	981	20	0.789041	0.380822	288	139	4.32924
	PG 39 -1_WS	10	T1b	3	core - band	78.7	972	23	0.90137	0.550685	329	201	13.0933
	PG 39 -1_WS	19C	T2	3	core - band		multiple		1.10137	0.50137	402	183	7.35378
	PG 39 -1_WS	15	T2	2/3	core - rim	70.7	968	21	1.90137	0.958904	694	350	2.01354
	PG 39 -1_WS	14	T1b	2	core - rim	82	1008	25	2.6411	1.52877	964	558	1.98824
	PG 39 -1_WS	3	T2	2	core - rim	67.2	950	20	3.45205	1.72055	1260	628	1.8136
	PG 39 -1_WS	31	T1a	2	core - band		multiple		3.80822	1.90137	1390	694	4.12943
	PG 37 -1_WS	3	T2	2	core - rim	67.6	960	20	3.91781	1.93973	1430	708	13.4207
	PG 39 -1_WS	23	T1b	2	core - band		multiple		4.19178	2.2	1530	803	5.36826
	PG 39 -1_WS	39	T2	2	core - rim	68.7	950	20	4.93151	2.46027	1800	898	1.98824
	PG 39 -1_WS	6	T2	2	core - rim	68.7	986	8	4.9589	0.980822	1810	358	53.6826
	PG 39 -1_WS	28	T1a	2	core - band	76.5	967	20	6.19178	3.15068	2260	1150	1.19295
	PG 37 -1_WS	27	T1b	2	core - rim	70.3	960	20	6.82192	3.36986	2490	1230	2.33403
	PG 39 -1_WS	4	T1b	2	core - band		multiple		7.58904	5.58904	2770	2040	1.91724
	PG 39 -1_WS	27	T2	1/2	core - band	70.1	975	19	10.9589	5.06849	4000	1850	0.47801
	PG 37 -1_WS	28	T1b	1	core - rim	67.5	960	20	17.1781	8.65753	6270	3160	0.236487
	PG 37 -1_WS	29	T1b	1	core - rim	73.4	976	23	18.5205	10.1918	6760	3720	1.09556
	PG 39 -1_WS	22	T2	1	core - rim	66.7	950	20	19.589	9.75342	7150	3560	1.37648
	PG 37 -1_WS	19	T2	1	core - rim	75.9	960	20	27.1781	13.2877	9920	4850	0.1938
	PG 37 -1_WS	12	T2	1	core - rim	67.1	960	20	27.2055	13.3151	9930	4860	53.6826
	PG 37 -1_WS	23	T1b	1	core - rim	62.3	960	20	34.2466	17.2055	12500	6280	0.208882
Tochimilco Pumice	POP106B_WS	22	T1B	7	core - rim	74.9	990	20	0.01	0.01	3.65	3.65
	POP106B_WS	35	T1A	7	core - rim	79.5	1030	26	0.01	0.004	3.65	1.46	→∞
	POP106C_WS	16	T1A	7	core - rim	82.9	1011	30	0.02	0.01	7.3	3.65	261.489
	POP106C_WS	51	T1B	7	core - band	84.6	1036	29	0.030137	0.02	11	7.3	257.955
	POP106B_WS	8	T1A	7	core - rim	68.2	950	20	0.030137	0.01	11	3.65	→∞
	POP106B_WS	25	T1A	6	core - rim	71	973	20	0.06	0.030137	21.9	11	87.5628
	POP106B_WS	42	T1A	6	core - rim	74.7	981	20	0.06	0.030137	21.9	11	→∞
	POP106B_WS	29	T1A	6	core - rim	77.4	987	17	0.08	0.030137	29.2	11	130.744
	POP106B_WS	33	T1A	6	core - rim	85.2	1030	30	0.1	0.070137	36.5	25.6	130.744
	POP106B_WS	56	T1A	7	core - band		multiple		0.130137	0.06	47.5	21.9	86.7668
	POP106B_WS	49	T1A	6	core - rim	72.7	950	20	0.150137	0.08	54.8	29.2	52.1549
	POP106C_WS	65	T1A	5	core - rim	81.2	1011	28	0.430137	0.279452	157	102	9.33889
	POP106C_WS	62	T1B	5	core - band	84.1	1011	28	0.750685	0.479452	274	175	8.15756
	POP106C_WS	56	T1B	5	core - band	80.3	991	23	1.27945	0.690411	467	252	4.94526
	POP106C_WS	45	T1A	4	core - rim	78.6	988	17	1.41918	0.580822	518	212	18.7144
	POP106C_WS	29	T1B	4	core - rim	72.5	978	20	1.61918	0.819178	591	299	13.0744
	POP106B_WS	30	T2	4	core - rim	72.6	966	20	1.7589	0.90137	642	329	18.7144
	POP106C_WS	39	T1A	4	core - rim	73.9	986	20	2.01918	0.969863	737	354	10.0467
	POP106C_WS	44	T1B	4	core - rim	75.5	986	20	2.44932	1.18904	894	434	6.0792
	POP106C_WS	1	T2	4	core - rim	71.9	978	20	2.46027	1.18082	898	431	238.609
	POP106C_WS	5	T1B	4	core - rim	73.9	984	20	3.17808	1.50959	1160	551	3.64288
	POP106C_WS	20	T2	4	core - rim	75.1	982	19	3.75342	1.72877	1370	631	4.54493
	POP106C_WS	43	T2	4	core - rim	74	977	19	4	2.32877	1460	850	10.6048
	POP106B_WS	55	T2	3	core - rim	77.6	987	17	4.84932	2.01918	1770	737	3.07882
	POP106C_WS	30	T2	3	core - rim	74.4	975	20	5.31507	2.4	1940	876	5.61432
	POP106C_WS	19	T2	3	core - rim	75	987	19	5.47945	2.47123	2000	902	15.9072
	POP106C_WS	55	T2	3	core - rim	74.9	973	20	6.76712	3.34247	2470	1220	2.03071
	POP106C_WS	28	T1A	3	core - rim	74.5	975	19	9.58904	4.60274	3500	1680	0.926636
	POP106C_WS	15	T1B	3	core - rim	75.6	987	19	10	4.65753	3650	1700	6.3629
	POP106C_WS	8	T1B	2	core - band		multiple		18.7945	10.7123	6860	3910	0.297332
	POP106C_WS	26	T1B	2	core - rim	75.7	987	19	30.411	13.7534	11100	5020	0.225103
	POP106C_WS	68	T2	2	core - rim	74.8	975	19	51.5068	23.4521	18800	8560	0.123953
	POP106C_WS	13	T2	1	core - band		multiple		86.3014	41.6438	31500	15200	0.0751524
Ventorrillo	POP37 _250-500	22	1B	5	core - dark band	82.6	1014	30	0.10137	0.0684932	37	25
	POP41_WS	45	1B	5	core - dark band	74.8	992	24	0.167123	0.0958904	61	35	85.105
	POP37_250-500	13	1B	5	core - rim	83.3	1026	30	0.172603	0.112329	63	41	1021.26
	POP41_250-500	1	1B	5	core - dark band	85	1032	26	0.194521	0.112329	71	41	255.315
	POP41_250-500	26	1B	4	core - band	76.1	966	25	0.249315	0.158904	91	58	102.126
	POP37a_WS	54	1A	5	core - rim	72.4	963	23	0.347945	0.20274	127	74	36.4736
	POP37 _250-500	40	1B	4	core - dark band	83	1020	31	0.539726	0.369863	197	135	29.1789
	POP37a_WS	68	1A	4	core - rim	65.4	950	20	0.550685	0.287671	201	105	510.63
	POP37a_WS	75	1A	4	core - rim	64.5	950	20	0.684932	0.347945	250	127	41.6841
	POP37 _250-500	12	1A	4	core - dark band	80.4	986	23	0.69589	0.389041	254	142	510.63
	POP37a_WS	72	1B	4	core - band		multiple		0.786301	0.380822	287	139	61.8945
	POP37a_WS	61	1A	4	core - dark band	65.6	950	20	0.80274	0.432877	293	158	340.42
	POP41_WS	37	1A	4	core - rim	76.2	990	22	0.873973	0.449315	319	164	78.5585
	POP41_WS	41	1A	4	core - rim	68.4	982	23	0.983562	0.542466	359	198	51.063
	POP37 _250-500	8	2	4	core - band		multiple		1.13973	1.42466	416	520	35.8337
	POP37a_WS	53a	1A	4	core - band		multiple		1.19178	0.608219	435	222	107.501
	POP37a_WS	77	2	3	core - rim	72.5	964	20	2.12055	1.11781	774	408	6.02513
	POP38R_250-500	9	1B	3	core - band		multiple		2.93151	1.9863	1070	725	6.90041
	POP37_500-1000	1	2	3	core - rim	68.6	950	20	4.0274	2.11781	1470	773	5.1063
	POP41_WS	32	2	3	core - rim	72.2	971	23	7.34247	4.05479	2680	1480	1.68803
	POP41_250-500	9	1A	2	core - rim	64	950	20	30.9589	15.6438	11300	5710	0.236951
	POP38R_250-500	14	2	2	core - band		multiple		41.0959	20.8932	15000	7626	0.552032
	POP41_500-1000	30	1B	2	core - rim	62.4	950	20	55.6164	27.6712	20300	10100	0.385381
	POP37_500-1000	5	2	2	core - rim	65	950	20	77.2603	39.4521	28200	14400	0.258547
	POP37_500-1000	4	2	1	core - rim	63.8	950	20	140	70.9589	51100	25900	0.089193
* after Mangler et al. (2020)
† core - rim / band - rim: last pre-eruptive recharge event recorded by crystal; core - band / band - band: earlier recharge event recorded by crystal
$ after Mangler et al. (2020). Multiple temperatures were used for modeling of interior zones with the non-isothermal diffusion incremental step model (cf. Petrone et al., 2016)
# timescale density. Events with d<1 are classified as background activity (blue); events with d>1 represent increased activity (red) priming the plumbing system for eruption (referred to in the text
as priming duration).

## Sheet: Table S2 - Fe-Ti oxides
TABLE S2. FE-TI OXIDE THERMO-OXYBAROMETRY FOR TOUCHING MAG-ILM PAIRS IN COMPOSITIONAL EQUILIBRIUM (BACON AND HIRSCHMANN, 1988)
Unit	Sample	Pair	Host	T (°C)*	ΔNNO*	logfO2†
YP	POP-28	OX2a/2b	GM	1012	1.2	-8.79
	POP-28	OX3a/3b	GM	1011	1.24	-8.765
	Average			1012	1.22	-8.77
Nealticán	POP-99	Cum1_Ox2a/Ox2b	Cumulate	979	0.17	-10.33
	POP-99	Cum1_Ox3a/Ox3b	Cumulate	951	0.06	-10.894
	POP-99	Px4_Ox1a/1b	Px	956	0.04	-10.83
	POP-101	OX4a1/a2	GM	971	0	-10.628
	POP-101	OX4_c1/c2	GM	965	-0.05	-10.774
	POP-101	OX4_d1/d2	GM	933	-0.25	-11.507
	POP-101	Ox5a/5b	GM	888	-0.48	-12.536
	POP-101	GM_Ox6a/6b	GM	893	-0.44	-12.404
	POP-101	Px13_Ox1a/1b	Px	903	-0.43	-12.213
	POP-101	Px13_Ox2a/2b	Px	904	-0.35	-12.115
	POP-101	Px13_Ox3a/3b	Px	1030	0.44	-9.283
	POP-97-2		GM	889	-0.28	-12.318
	Average			938.5	-0.131	-11.32
	POP-112	Ox3_light/dark	GM	992	1.11	-9.186
PP	POP-112	Ox5a/Ox5	GM	1014	1.08	-8.88
	POP-112	Ox5b/Ox5	GM	1049	1.03	-8.418
	POP-08	Ox1a/1b	GM	961	0.9	-9.889
	Average			1004	1.03	-9.093
Global Average				985	0.71	-9.73
GM - Groundmass
* after Ghiorso and Evans (2008)
† after Frost (1991), assuming P = 1.4 kbar (Atlas et al., 2006)

## Sheet: Table S3 - Global timescales
TABLE S3. COMPILATION OF PUBLISHED DIFFUSION TIMESCALES AND CALCULATED TIMESCALE DENSITIES TO DEFINE PRIMING DURATIONS.
Volcano	Eruption	Mineral / Element system	Diffusion coefficent	Sample	Crystal	Profile	Boundary modelled	Time since event (yr)	+error*	-error*	Time since event (d)†	+error*	-error*	Timescale density $	Reference
Shishaldin	1999 Sub-Plinian	Fe-Mg in ol	Dohmen & Chakraborty (2007)	15		09ccl	rim	0.000421644	0.000396438	0.000453425	0.1539	0.1447	0.1655		Rasmussen et al. (2018)
Shishaldin	1999 Sub-Plinian	Fe-Mg in ol	Dohmen & Chakraborty (2007)	15		37cl	rim	0.000643836	0.000420548	0.000535342	0.235	0.1535	0.1954	165.972	Rasmussen et al. (2018)
Shishaldin	1999 Sub-Plinian	Fe-Mg in ol	Dohmen & Chakraborty (2007)	29		99ccl	rim	0.0010463	0.000386301	0.000523014	0.3819	0.141	0.1909	91.6294	Rasmussen et al. (2018)
Shishaldin	1999 Sub-Plinian	Fe-Mg in ol	Dohmen & Chakraborty (2007)	29		49cl	rim	0.00126849	0.000454795	0.000786027	0.463	0.166	0.2869	165.972	Rasmussen et al. (2018)
Shishaldin	1999 Sub-Plinian	Fe-Mg in ol	Dohmen & Chakraborty (2007)	47		63cl	rim	0.00140164	0.000604932	0.00111096	0.5116	0.2208	0.4055	276.962	Rasmussen et al. (2018)
Shishaldin	1999 Sub-Plinian	Fe-Mg in ol	Dohmen & Chakraborty (2007)	25		45ccl	rim	0.00196603	0.000796986	0.00130384	0.7176	0.2909	0.4759	65.3415	Rasmussen et al. (2018)
Shishaldin	1999 Sub-Plinian	Fe-Mg in ol	Dohmen & Chakraborty (2007)	47		69ccl	rim	0.00219753	0.000722466	0.00114301	0.8021	0.2637	0.4172	159.294	Rasmussen et al. (2018)
Shishaldin	1999 Sub-Plinian	Fe-Mg in ol	Dohmen & Chakraborty (2007)	25		0	rim	0.00323562	0.00194932	0.0020263	1.181	0.7115	0.7396	35.5248	Rasmussen et al. (2018)
Shishaldin	1999 Sub-Plinian	Fe-Mg in ol	Dohmen & Chakraborty (2007)	163		111cl	rim	0.00575616	0.00239425	0.00298904	2.101	0.8739	1.091	14.6308	Rasmussen et al. (2018)
Shishaldin	1999 Sub-Plinian	Fe-Mg in ol	Dohmen & Chakraborty (2007)	163		0	rim	0.00603836	0.00252904	0.00363562	2.204	0.9231	1.327	130.683	Rasmussen et al. (2018)
Shishaldin	1999 Sub-Plinian	Fe-Mg in ol	Dohmen & Chakraborty (2007)	35		0	rim	0.0275616	0.0109452	0.0132904	10.06	3.995	4.851	1.71339	Rasmussen et al. (2018)
Shishaldin	1999 Sub-Plinian	Fe-Mg in ol	Dohmen & Chakraborty (2007)	MI29		N66cc	rim	0.0302466	0.0110466	0.0159178	11.04	4.032	5.81	13.7351	Rasmussen et al. (2018)
Shishaldin	1999 Sub-Plinian	Fe-Mg in ol	Dohmen & Chakraborty (2007)	35		132cl	rim	0.0352329	0.0129644	0.0168932	12.86	4.732	6.166	7.3958	Rasmussen et al. (2018)
Shishaldin	1999 Sub-Plinian	Fe-Mg in ol	Dohmen & Chakraborty (2007)	175		130cl	rim	0.035863	0.0139534	0.0176658	13.09	5.093	6.448	58.5233	Rasmussen et al. (2018)
Shishaldin	1999 Sub-Plinian	Fe-Mg in ol	Dohmen & Chakraborty (2007)	18		0	rim	0.0412329	0.0133534	0.0212603	15.05	4.874	7.76	6.86753	Rasmussen et al. (2018)
Shishaldin	1999 Sub-Plinian	Fe-Mg in ol	Dohmen & Chakraborty (2007)	14		09ccl	rim	0.0428767	0.0142438	0.0203863	15.65	5.199	7.441	22.4339	Rasmussen et al. (2018)
Shishaldin	1999 Sub-Plinian	Fe-Mg in ol	Dohmen & Chakraborty (2007)	14		95cl	rim	0.0443836	0.0147123	0.0226247	16.2	5.37	8.258	24.4734	Rasmussen et al. (2018)
Shishaldin	1999 Sub-Plinian	Fe-Mg in ol	Dohmen & Chakraborty (2007)	175		0	rim	0.0445205	0.0144986	0.0220493	16.25	5.292	8.048	269.207	Rasmussen et al. (2018)
Shishaldin	1999 Sub-Plinian	Fe-Mg in ol	Dohmen & Chakraborty (2007)	18		53ccl	rim	0.0608767	0.0216411	0.0295342	22.22	7.899	10.78	2.25467	Rasmussen et al. (2018)
Shishaldin	1999 Sub-Plinian	Fe-Mg in ol	Dohmen & Chakraborty (2007)	112		38ccl	rim	0.0723014	0.0261151	0.0377534	26.39	9.532	13.78	3.2279	Rasmussen et al. (2018)
Shishaldin	1999 Sub-Plinian	Fe-Mg in ol	Dohmen & Chakraborty (2007)	30		57cl	rim	0.0780822	0.0248877	0.037863	28.5	9.084	13.82	6.37931	Rasmussen et al. (2018)
Shishaldin	1999 Sub-Plinian	Fe-Mg in ol	Dohmen & Chakraborty (2007)	66		0	rim	0.0792877	0.0257315	0.0384932	28.94	9.392	14.05	30.5917	Rasmussen et al. (2018)
Shishaldin	1999 Sub-Plinian	Fe-Mg in ol	Dohmen & Chakraborty (2007)	66		133ccl	rim	0.0856164	0.0276986	0.0414795	31.25	10.11	15.14	5.82699	Rasmussen et al. (2018)
Shishaldin	1999 Sub-Plinian	Fe-Mg in ol	Dohmen & Chakraborty (2007)	73		117ccl	rim	0.0867671	0.0298082	0.042274	31.67	10.88	15.43	32.0485	Rasmussen et al. (2018)
Shishaldin	1999 Sub-Plinian	Fe-Mg in ol	Dohmen & Chakraborty (2007)	MI43		N108cl	rim	0.0898904	0.0294521	0.0490685	32.81	10.75	17.91	11.8073	Rasmussen et al. (2018)
Shishaldin	1999 Sub-Plinian	Fe-Mg in ol	Dohmen & Chakraborty (2007)	MI43		N62cl	rim	0.0991781	0.0364384	0.0480274	36.2	13.3	17.53	3.97061	Rasmussen et al. (2018)
Shishaldin	1999 Sub-Plinian	Fe-Mg in ol	Dohmen & Chakraborty (2007)	32		129ccl	rim	0.0993151	0.0340822	0.0594795	36.25	12.44	21.71	269.207	Rasmussen et al. (2018)
Shishaldin	1999 Sub-Plinian	Fe-Mg in ol	Dohmen & Chakraborty (2007)	MI27		N25cl	rim	0.0998904	0.0352603	0.0502466	36.46	12.87	18.34	64.0969	Rasmussen et al. (2018)
Shishaldin	1999 Sub-Plinian	Fe-Mg in ol	Dohmen & Chakraborty (2007)	44		37ccl	rim	0.105288	0.0337534	0.0500822	38.43	12.32	18.28	6.83267	Rasmussen et al. (2018)
Shishaldin	1999 Sub-Plinian	Fe-Mg in ol	Dohmen & Chakraborty (2007)	44		66cl	rim	0.105288	0.0350137	0.0545205	38.43	12.78	19.9	→∞	Rasmussen et al. (2018)
Shishaldin	1999 Sub-Plinian	Fe-Mg in ol	Dohmen & Chakraborty (2007)	73		0	rim	0.105425	0.0364932	0.0510959	38.48	13.32	18.65	269.207	Rasmussen et al. (2018)
Shishaldin	1999 Sub-Plinian	Fe-Mg in ol	Dohmen & Chakraborty (2007)	MI27		N25cc	rim	0.107644	0.0365479	0.0516712	39.29	13.34	18.86	16.6177	Rasmussen et al. (2018)
Shishaldin	1999 Sub-Plinian	Fe-Mg in ol	Dohmen & Chakraborty (2007)	30		0	rim	0.109205	0.0363562	0.0526301	39.86	13.27	19.21	23.6147	Rasmussen et al. (2018)
Shishaldin	1999 Sub-Plinian	Fe-Mg in ol	Dohmen & Chakraborty (2007)	107		14ccl	rim	0.118603	0.0386849	0.0570959	43.29	14.12	20.84	3.9243	Rasmussen et al. (2018)
Shishaldin	1999 Sub-Plinian	Fe-Mg in ol	Dohmen & Chakraborty (2007)	31		0	rim	0.118712	0.0429041	0.0597534	43.33	15.66	21.81	336.509	Rasmussen et al. (2018)
Shishaldin	1999 Sub-Plinian	Fe-Mg in ol	Dohmen & Chakraborty (2007)	17		125ccl	rim	0.119726	0.0481096	0.0613151	43.7	17.56	22.38	36.3793	Rasmussen et al. (2018)
Shishaldin	1999 Sub-Plinian	Fe-Mg in ol	Dohmen & Chakraborty (2007)	156		58ccl	rim	0.122411	0.0390411	0.0619178	44.68	14.25	22.6	13.7351	Rasmussen et al. (2018)
Shishaldin	1999 Sub-Plinian	Fe-Mg in ol	Dohmen & Chakraborty (2007)	MI28		N97cc	rim	0.124822	0.0425753	0.0596164	45.56	15.54	21.76	15.2959	Rasmussen et al. (2018)
Shishaldin	1999 Sub-Plinian	Fe-Mg in ol	Dohmen & Chakraborty (2007)	112		13cl	rim	0.126192	0.0547945	0.0598904	46.06	20	21.86	26.9207	Rasmussen et al. (2018)
Shishaldin	1999 Sub-Plinian	Fe-Mg in ol	Dohmen & Chakraborty (2007)	53		08cl	rim	0.126521	0.0418904	0.0670137	46.18	15.29	24.46	112.17	Rasmussen et al. (2018)
Shishaldin	1999 Sub-Plinian	Fe-Mg in ol	Dohmen & Chakraborty (2007)	MI26		N170cc	rim	0.126521	0.0434795	0.0627397	46.18	15.87	22.9	→∞	Rasmussen et al. (2018)
Shishaldin	1999 Sub-Plinian	Fe-Mg in ol	Dohmen & Chakraborty (2007)	17		05ccl	rim	0.126712	0.0437808	0.0606849	46.25	15.98	22.15	192.291	Rasmussen et al. (2018)
Shishaldin	1999 Sub-Plinian	Fe-Mg in ol	Dohmen & Chakraborty (2007)	158		172cl	rim	0.133178	0.0455342	0.0652055	48.61	16.62	23.8	5.70354	Rasmussen et al. (2018)
Shishaldin	1999 Sub-Plinian	Fe-Mg in ol	Dohmen & Chakraborty (2007)	156		11cl	rim	0.134219	0.0424932	0.0635616	48.99	15.51	23.2	35.422	Rasmussen et al. (2018)
Shishaldin	1999 Sub-Plinian	Fe-Mg in ol	Dohmen & Chakraborty (2007)	58		0	rim	0.134767	0.0455616	0.070411	49.19	16.63	25.7	67.3018	Rasmussen et al. (2018)
Shishaldin	1999 Sub-Plinian	Fe-Mg in ol	Dohmen & Chakraborty (2007)	155		39cl	rim	0.138521	0.0445205	0.0686027	50.56	16.25	25.04	9.82508	Rasmussen et al. (2018)
Shishaldin	1999 Sub-Plinian	Fe-Mg in ol	Dohmen & Chakraborty (2007)	56		110ccl	rim	0.140795	0.0463014	0.0670685	51.39	16.9	24.48	16.2173	Rasmussen et al. (2018)
Shishaldin	1999 Sub-Plinian	Fe-Mg in ol	Dohmen & Chakraborty (2007)	48		0	rim	0.144603	0.0471507	0.0716986	52.78	17.21	26.17	9.68371	Rasmussen et al. (2018)
Shishaldin	1999 Sub-Plinian	Fe-Mg in ol	Dohmen & Chakraborty (2007)	155		11ccl	rim	0.145178	0.0487945	0.0748219	52.99	17.81	27.31	64.0969	Rasmussen et al. (2018)
Shishaldin	1999 Sub-Plinian	Fe-Mg in ol	Dohmen & Chakraborty (2007)	31		133ccl	rim	0.148438	0.0487397	0.0756164	54.18	17.79	27.6	11.3112	Rasmussen et al. (2018)
Shishaldin	1999 Sub-Plinian	Fe-Mg in ol	Dohmen & Chakraborty (2007)	48		73cl	rim	0.149151	0.0490685	0.0730959	54.44	17.91	26.68	51.7706	Rasmussen et al. (2018)
Shishaldin	1999 Sub-Plinian	Fe-Mg in ol	Dohmen & Chakraborty (2007)	32		11ccl	rim	0.151534	0.0493425	0.073726	55.31	18.01	26.91	15.4717	Rasmussen et al. (2018)
Shishaldin	1999 Sub-Plinian	Fe-Mg in ol	Dohmen & Chakraborty (2007)	MI28		N22cc	rim	0.153233	0.0513425	0.0760274	55.93	18.74	27.75	21.7102	Rasmussen et al. (2018)
Shishaldin	1999 Sub-Plinian	Fe-Mg in ol	Dohmen & Chakraborty (2007)	16		110ccl	rim	0.153479	0.0511507	0.0758904	56.02	18.67	27.7	149.559	Rasmussen et al. (2018)
Shishaldin	1999 Sub-Plinian	Fe-Mg in ol	Dohmen & Chakraborty (2007)	56		0	rim	0.157288	0.0510685	0.0751233	57.41	18.64	27.42	9.68371	Rasmussen et al. (2018)
Shishaldin	1999 Sub-Plinian	Fe-Mg in ol	Dohmen & Chakraborty (2007)	169		61 cl	rim	0.159808	0.0531233	0.0788493	58.33	19.39	28.78	14.6308	Rasmussen et al. (2018)
Shishaldin	1999 Sub-Plinian	Fe-Mg in ol	Dohmen & Chakraborty (2007)	68		94cl	rim	0.161726	0.0530685	0.0791233	59.03	19.37	28.88	19.2291	Rasmussen et al. (2018)
Shishaldin	1999 Sub-Plinian	Fe-Mg in ol	Dohmen & Chakraborty (2007)	58		59ccl	rim	0.162685	0.0568493	0.0783014	59.38	20.75	28.58	38.4582	Rasmussen et al. (2018)
Shishaldin	1999 Sub-Plinian	Fe-Mg in ol	Dohmen & Chakraborty (2007)	158		121cl	rim	0.172247	0.057589	0.0817808	62.87	21.02	29.85	3.85684	Rasmussen et al. (2018)
Shishaldin	1999 Sub-Plinian	Fe-Mg in ol	Dohmen & Chakraborty (2007)	178		0	rim	0.175342	0.0585479	0.0845753	64	21.37	30.87	11.9118	Rasmussen et al. (2018)
Shishaldin	1999 Sub-Plinian	Fe-Mg in ol	Dohmen & Chakraborty (2007)	107		86ccl	rim	0.177562	0.0592329	0.0867123	64.81	21.62	31.65	16.6177	Rasmussen et al. (2018)
Shishaldin	1999 Sub-Plinian	Fe-Mg in ol	Dohmen & Chakraborty (2007)	16		0	rim	0.18011	0.0593699	0.085863	65.74	21.67	31.34	14.4735	Rasmussen et al. (2018)
Shishaldin	1999 Sub-Plinian	Fe-Mg in ol	Dohmen & Chakraborty (2007)	53		57cl	rim	0.190247	0.0612329	0.0918904	69.44	22.35	33.54	3.63793	Rasmussen et al. (2018)
Shishaldin	1999 Sub-Plinian	Fe-Mg in ol	Dohmen & Chakraborty (2007)	MI17		N162cc	rim	0.191205	0.0647123	0.0926575	69.79	23.62	33.82	38.4582	Rasmussen et al. (2018)
Shishaldin	1999 Sub-Plinian	Fe-Mg in ol	Dohmen & Chakraborty (2007)	169		0	rim	0.203589	0.0742466	0.126055	74.31	27.1	46.01	2.97795	Rasmussen et al. (2018)
Shishaldin	1999 Sub-Plinian	Fe-Mg in ol	Dohmen & Chakraborty (2007)	MI11		0	rim	0.209288	0.0709315	0.101452	76.39	25.89	37.03	6.47132	Rasmussen et al. (2018)
Shishaldin	1999 Sub-Plinian	Fe-Mg in ol	Dohmen & Chakraborty (2007)	38		53ccl	rim	0.226411	0.0765205	0.110767	82.64	27.93	40.43	2.15366	Rasmussen et al. (2018)
Shishaldin	1999 Sub-Plinian	Fe-Mg in ol	Dohmen & Chakraborty (2007)	13		94ccl	rim	0.231479	0.0746027	0.11189	84.49	27.23	40.84	7.27587	Rasmussen et al. (2018)
Shishaldin	1999 Sub-Plinian	Fe-Mg in ol	Dohmen & Chakraborty (2007)	178		61cl	rim	0.240986	0.0769041	0.114438	87.96	28.07	41.77	3.87906	Rasmussen et al. (2018)
Shishaldin	1999 Sub-Plinian	Fe-Mg in ol	Dohmen & Chakraborty (2007)	MI17		N147cl	rim	0.247342	0.0886849	0.120274	90.28	32.37	43.9	5.80188	Rasmussen et al. (2018)
Shishaldin	1999 Sub-Plinian	Fe-Mg in ol	Dohmen & Chakraborty (2007)	MI41		N14cc	rim	0.260027	0.0865753	0.125288	94.91	31.6	45.73	2.9072	Rasmussen et al. (2018)
Shishaldin	1999 Sub-Plinian	Fe-Mg in ol	Dohmen & Chakraborty (2007)	38		0	rim	0.261041	0.0885479	0.12526	95.28	32.32	45.72	36.3793	Rasmussen et al. (2018)
Shishaldin	1999 Sub-Plinian	Fe-Mg in ol	Dohmen & Chakraborty (2007)	13		176cl	rim	0.269534	0.0895068	0.132932	98.38	32.67	48.52	4.34205	Rasmussen et al. (2018)
Shishaldin	1999 Sub-Plinian	Fe-Mg in ol	Dohmen & Chakraborty (2007)	39		0	rim	0.282466	0.0928767	0.135534	103.1	33.9	49.47	2.85177	Rasmussen et al. (2018)
Shishaldin	1999 Sub-Plinian	Fe-Mg in ol	Dohmen & Chakraborty (2007)	MI41		N114cc	rim	0.287397	0.0924658	0.136822	104.9	33.75	49.94	7.47797	Rasmussen et al. (2018)
Shishaldin	1999 Sub-Plinian	Fe-Mg in ol	Dohmen & Chakraborty (2007)	36		0	rim	0.290137	0.095863	0.148932	105.9	34.99	54.36	13.4604	Rasmussen et al. (2018)
Shishaldin	1999 Sub-Plinian	Fe-Mg in ol	Dohmen & Chakraborty (2007)	45		133cl	rim	0.290959	0.0956712	0.138603	106.2	34.92	50.59	44.8678	Rasmussen et al. (2018)
Shishaldin	1999 Sub-Plinian	Fe-Mg in ol	Dohmen & Chakraborty (2007)	108		55ccl	rim	0.323562	0.134685	0.161397	118.1	49.16	58.91	1.13112	Rasmussen et al. (2018)
Shishaldin	1999 Sub-Plinian	Fe-Mg in ol	Dohmen & Chakraborty (2007)	173		84ccl	rim	0.341918	0.112466	0.164027	124.8	41.05	59.87	2.00901	Rasmussen et al. (2018)
Shishaldin	1999 Sub-Plinian	Fe-Mg in ol	Dohmen & Chakraborty (2007)	59		0	rim	0.344384	0.116959	0.163562	125.7	42.69	59.7	14.9559	Rasmussen et al. (2018)
Shishaldin	1999 Sub-Plinian	Fe-Mg in ol	Dohmen & Chakraborty (2007)	39		42ccl	rim	0.350959	0.116877	0.167699	128.1	42.66	61.21	5.60848	Rasmussen et al. (2018)
Shishaldin	1999 Sub-Plinian	Fe-Mg in ol	Dohmen & Chakraborty (2007)	59		180	rim	0.353425	0.116137	0.167726	129	42.39	61.22	14.9559	Rasmussen et al. (2018)
Shishaldin	1999 Sub-Plinian	Fe-Mg in ol	Dohmen & Chakraborty (2007)	173		0	rim	0.383562	0.12537	0.183671	140	45.76	67.04	1.22367	Rasmussen et al. (2018)
Shishaldin	1999 Sub-Plinian	Fe-Mg in ol	Dohmen & Chakraborty (2007)	114		44cl	rim	0.385205	0.130301	0.183781	140.6	47.56	67.08	22.4339	Rasmussen et al. (2018)
Shishaldin	1999 Sub-Plinian	Fe-Mg in ol	Dohmen & Chakraborty (2007)	MI16		N149cc	rim	0.393151	0.126411	0.202411	143.5	46.14	73.88	4.6415	Rasmussen et al. (2018)
Shishaldin	1999 Sub-Plinian	Fe-Mg in ol	Dohmen & Chakraborty (2007)	70		06cl	rim	0.396164	0.113096	0.182164	144.6	41.28	66.49	12.2367	Rasmussen et al. (2018)
Shishaldin	1999 Sub-Plinian	Fe-Mg in ol	Dohmen & Chakraborty (2007)	36		78ccl	rim	0.396712	0.133836	0.189151	144.8	48.85	69.04	67.3018	Rasmussen et al. (2018)
Shishaldin	1999 Sub-Plinian	Fe-Mg in ol	Dohmen & Chakraborty (2007)	45		0	rim	0.410959	0.132521	0.201562	150	48.37	73.57	2.58853	Rasmussen et al. (2018)
Shishaldin	1999 Sub-Plinian	Fe-Mg in ol	Dohmen & Chakraborty (2007)	108		0	rim	0.41863	0.135507	0.199726	152.8	49.46	72.9	4.80727	Rasmussen et al. (2018)
Shishaldin	1999 Sub-Plinian	Fe-Mg in ol	Dohmen & Chakraborty (2007)	110		08ccl	rim	0.430685	0.146192	0.206658	157.2	53.36	75.43	3.05917	Rasmussen et al. (2018)
Shishaldin	1999 Sub-Plinian	Fe-Mg in ol	Dohmen & Chakraborty (2007)	110		51ccl	rim	0.492877	0.16537	0.240301	179.9	60.36	87.71	0.592967	Rasmussen et al. (2018)
Shishaldin	1999 Sub-Plinian	Fe-Mg in ol	Dohmen & Chakraborty (2007)	114		06ccl	rim	0.498904	0.162164	0.238356	182.1	59.19	87	6.11834	Rasmussen et al. (2018)
Shishaldin	1999 Sub-Plinian	Fe-Mg in ol	Dohmen & Chakraborty (2007)	46		179ccl	rim	0.501644	0.16811	0.248904	183.1	61.36	90.85	13.4604	Rasmussen et al. (2018)
Shishaldin	1999 Sub-Plinian	Fe-Mg in ol	Dohmen & Chakraborty (2007)	MI16		N81cl	rim	0.506027	0.167589	0.275616	184.7	61.17	100.6	8.41272	Rasmussen et al. (2018)
Shishaldin	1999 Sub-Plinian	Fe-Mg in ol	Dohmen & Chakraborty (2007)	MI42		N27cc	rim	0.506027	0.169479	0.264301	184.7	61.86	96.47	→∞	Rasmussen et al. (2018)
Shishaldin	1999 Sub-Plinian	Fe-Mg in ol	Dohmen & Chakraborty (2007)	170		133cl	rim	0.528219	0.179178	0.264274	192.8	65.4	96.46	1.66177	Rasmussen et al. (2018)
Shishaldin	1999 Sub-Plinian	Fe-Mg in ol	Dohmen & Chakraborty (2007)	46		107ccl	rim	0.532603	0.17389	0.262849	194.4	63.47	95.94	8.41272	Rasmussen et al. (2018)
Shishaldin	1999 Sub-Plinian	Fe-Mg in ol	Dohmen & Chakraborty (2007)	70		55ccl	rim	0.593699	0.198384	0.286301	216.7	72.41	104.5	0.603603	Rasmussen et al. (2018)
Shishaldin	1999 Sub-Plinian	Fe-Mg in ol	Dohmen & Chakraborty (2007)	MI42		N47cl	rim	0.621644	0.200658	0.309589	226.9	73.24	113	1.31964	Rasmussen et al. (2018)
Shishaldin	1999 Sub-Plinian	Fe-Mg in ol	Dohmen & Chakraborty (2007)	71		48cl	rim	0.684932	0.220877	0.350137	250	80.62	127.8	0.582699	Rasmussen et al. (2018)
Shishaldin	1999 Sub-Plinian	Fe-Mg in ol	Dohmen & Chakraborty (2007)	84		0	rim	0.741918	0.251781	0.394247	270.8	91.9	143.9	0.647132	Rasmussen et al. (2018)
Shishaldin	1999 Sub-Plinian	Fe-Mg in ol	Dohmen & Chakraborty (2007)	71		0	rim	0.829589	0.271178	0.412329	302.8	98.98	150.5	0.420636	Rasmussen et al. (2018)
Shishaldin	1999 Sub-Plinian	Fe-Mg in ol	Dohmen & Chakraborty (2007)	MI15		N134cc	rim	0.83726	0.286301	0.4	305.6	104.5	146	4.80727	Rasmussen et al. (2018)
Shishaldin	1999 Sub-Plinian	Fe-Mg in ol	Dohmen & Chakraborty (2007)	12		53ccl	rim	0.844932	0.27726	0.405205	308.4	101.2	147.9	4.80727	Rasmussen et al. (2018)
Shishaldin	1999 Sub-Plinian	Fe-Mg in ol	Dohmen & Chakraborty (2007)	MI02		65cl	rim	0.849863	0.287671	0.405479	310.2	105	148	7.47797	Rasmussen et al. (2018)
Shishaldin	1999 Sub-Plinian	Fe-Mg in ol	Dohmen & Chakraborty (2007)	67		59ccl	rim	0.868767	0.293425	0.414247	317.1	107.1	151.2	1.95078	Rasmussen et al. (2018)
Shishaldin	1999 Sub-Plinian	Fe-Mg in ol	Dohmen & Chakraborty (2007)	111		09cl	rim	0.924658	0.296712	0.449589	337.5	108.3	164.1	0.659821	Rasmussen et al. (2018)
Shishaldin	1999 Sub-Plinian	Fe-Mg in ol	Dohmen & Chakraborty (2007)	51		59cl	rim	0.933973	0.307945	0.497534	340.9	112.4	181.6	3.95893	Rasmussen et al. (2018)
Shishaldin	1999 Sub-Plinian	Fe-Mg in ol	Dohmen & Chakraborty (2007)	42		10cl	rim	0.936164	0.296438	0.447123	341.7	108.2	163.2	16.8254	Rasmussen et al. (2018)
Shishaldin	1999 Sub-Plinian	Fe-Mg in ol	Dohmen & Chakraborty (2007)	42		87cl	rim	0.945205	0.3	0.448767	345	109.5	163.8	4.0789	Rasmussen et al. (2018)
Shishaldin	1999 Sub-Plinian	Fe-Mg in ol	Dohmen & Chakraborty (2007)	109		0	rim	0.953699	0.304384	0.452877	348.1	111.1	165.3	4.34205	Rasmussen et al. (2018)
Shishaldin	1999 Sub-Plinian	Fe-Mg in ol	Dohmen & Chakraborty (2007)	157		74ccl	rim	0.954521	0.316712	0.459452	348.4	115.6	167.7	44.8678	Rasmussen et al. (2018)
Shishaldin	1999 Sub-Plinian	Fe-Mg in ol	Dohmen & Chakraborty (2007)	23		0	rim	0.96274	0.332055	0.473151	351.4	121.2	172.7	4.48678	Rasmussen et al. (2018)
Shishaldin	1999 Sub-Plinian	Fe-Mg in ol	Dohmen & Chakraborty (2007)	67		0	rim	0.96411	0.341918	0.465479	351.9	124.8	169.9	26.9207	Rasmussen et al. (2018)
Shishaldin	1999 Sub-Plinian	Fe-Mg in ol	Dohmen & Chakraborty (2007)	43		12cl	rim	0.966575	0.336164	0.46137	352.8	122.7	168.4	14.9559	Rasmussen et al. (2018)
Shishaldin	1999 Sub-Plinian	Fe-Mg in ol	Dohmen & Chakraborty (2007)	MI10		07ccl	rim	1.04	0.333699	0.494795	379.6	121.8	180.6	0.502252	Rasmussen et al. (2018)
Shishaldin	1999 Sub-Plinian	Fe-Mg in ol	Dohmen & Chakraborty (2007)	23		44cl	rim	1.0463	0.350685	0.498356	381.9	128	181.9	5.85233	Rasmussen et al. (2018)
Shishaldin	1999 Sub-Plinian	Fe-Mg in ol	Dohmen & Chakraborty (2007)	51		07cl	rim	1.05178	0.34411	0.503836	383.9	125.6	183.9	6.73018	Rasmussen et al. (2018)
Shishaldin	1999 Sub-Plinian	Fe-Mg in ol	Dohmen & Chakraborty (2007)	109		29ccl	rim	1.05425	0.33726	0.531233	384.8	123.1	193.9	14.9559	Rasmussen et al. (2018)
Shishaldin	1999 Sub-Plinian	Fe-Mg in ol	Dohmen & Chakraborty (2007)	MI02		0	rim	1.05589	0.344932	0.524384	385.4	125.9	191.4	22.4339	Rasmussen et al. (2018)
Shishaldin	1999 Sub-Plinian	Fe-Mg in ol	Dohmen & Chakraborty (2007)	12		0	rim	1.06082	0.346301	0.510959	387.2	126.4	186.5	7.47797	Rasmussen et al. (2018)
Shishaldin	1999 Sub-Plinian	Fe-Mg in ol	Dohmen & Chakraborty (2007)	111		65cl	rim	1.11315	0.372055	0.532329	406.3	135.8	194.3	0.704731	Rasmussen et al. (2018)
Shishaldin	1999 Sub-Plinian	Fe-Mg in ol	Dohmen & Chakraborty (2007)	19		0	rim	1.11452	0.35589	0.529589	406.8	129.9	193.3	26.9207	Rasmussen et al. (2018)
Shishaldin	1999 Sub-Plinian	Fe-Mg in ol	Dohmen & Chakraborty (2007)	MI15		N91cl	rim	1.14301	0.375068	0.558904	417.2	136.9	204	1.29426	Rasmussen et al. (2018)
Shishaldin	1999 Sub-Plinian	Fe-Mg in ol	Dohmen & Chakraborty (2007)	19		74cl	rim	1.33178	0.449041	0.635068	486.1	163.9	231.8	0.195361	Rasmussen et al. (2018)
Shishaldin	1999 Sub-Plinian	Fe-Mg in ol	Dohmen & Chakraborty (2007)	157		0	rim	1.39836	0.469589	0.704384	510.4	171.4	257.1	0.553924	Rasmussen et al. (2018)
Shishaldin	1999 Sub-Plinian	Fe-Mg in ol	Dohmen & Chakraborty (2007)	43		28ccl	rim	1.43014	0.469315	0.685479	522	171.3	250.2	1.16038	Rasmussen et al. (2018)
Shishaldin	1999 Sub-Plinian	Fe-Mg in ol	Dohmen & Chakraborty (2007)	33		0	rim	1.93808	0.618356	0.920274	707.4	225.7	335.9	0.0726017	Rasmussen et al. (2018)
Shishaldin	1999 Sub-Plinian	Fe-Mg in ol	Dohmen & Chakraborty (2007)	60		68ccl	rim	3.31507	1.07589	1.58356	1210	392.7	578	0.0267814	Rasmussen et al. (2018)
Shishaldin	1999 Sub-Plinian	Fe-Mg in ol	Dohmen & Chakraborty (2007)	60		0	rim	4.79452	1.56521	2.33726	1750	571.3	853.1	0.0249266	Rasmussen et al. (2018)
Eyjafjallajokull	Fimmvorduháls 2010	Fe-Mg in ol	Dohmen & Chakraborty (2007)		F_2CT_D4						2010.26	0.00124795	0.000787405		Pankhurst et al. (2018)
Eyjafjallajokull	Fimmvorduháls 2010	Fe-Mg in ol	Dohmen & Chakraborty (2007)		F_2CT_C8						2010.26	0.00474456	0.00299362	3.38212	Pankhurst et al. (2018)
Eyjafjallajokull	Fimmvorduháls 2010	Fe-Mg in ol	Dohmen & Chakraborty (2007)		F_2CT_J4						2010.25	0.0101298	0.00639144	2.19601	Pankhurst et al. (2018)
Eyjafjallajokull	Fimmvorduháls 2010	Fe-Mg in ol	Dohmen & Chakraborty (2007)		F_2CT_F5						2010.24	0.0129528	0.00817264	4.18912	Pankhurst et al. (2018)
Eyjafjallajokull	Fimmvorduháls 2010	Fe-Mg in ol	Dohmen & Chakraborty (2007)		F_2CT_C4						2010.24	0.0154183	0.00972831	4.79645	Pankhurst et al. (2018)
Eyjafjallajokull	Fimmvorduháls 2010	Fe-Mg in ol	Dohmen & Chakraborty (2007)		F_5C_B2						2010.23	0.00114549	0.000722758	3.52584	Pankhurst et al. (2018)
Eyjafjallajokull	Fimmvorduháls 2010	Fe-Mg in ol	Dohmen & Chakraborty (2007)		F_5C_G4						2010.23	0.00169102	0.00106696	21.6782	Pankhurst et al. (2018)
Eyjafjallajokull	Fimmvorduháls 2010	Fe-Mg in ol	Dohmen & Chakraborty (2007)		F_5C_E5						2010.23	0.00299854	0.00189195	9.04452	Pankhurst et al. (2018)
Eyjafjallajokull	Fimmvorduháls 2010	Fe-Mg in ol	Dohmen & Chakraborty (2007)		F_5C_A4						2010.23	0.00305751	0.00192916	200.564	Pankhurst et al. (2018)
Eyjafjallajokull	Fimmvorduháls 2010	Fe-Mg in ol	Dohmen & Chakraborty (2007)		F_3C_G6						2010.23	0.0114415	0.00721908	31.8132	Pankhurst et al. (2018)
Eyjafjallajokull	Fimmvorduháls 2010	Fe-Mg in ol	Dohmen & Chakraborty (2007)		F_5C_B4						2010.23	0.00367509	0.00231882	48.1024	Pankhurst et al. (2018)
Eyjafjallajokull	Fimmvorduháls 2010	Fe-Mg in ol	Dohmen & Chakraborty (2007)		F_5C_D7						2010.23	0.00381728	0.00240854	83.1701	Pankhurst et al. (2018)
Eyjafjallajokull	Fimmvorduháls 2010	Fe-Mg in ol	Dohmen & Chakraborty (2007)		F_3C_D6						2010.23	0.0123573	0.00779695	22.4055	Pankhurst et al. (2018)
Eyjafjallajokull	Fimmvorduháls 2010	Fe-Mg in ol	Dohmen & Chakraborty (2007)		F_5C_E7						2010.23	0.00455408	0.00287343	56.5868	Pankhurst et al. (2018)
Eyjafjallajokull	Fimmvorduháls 2010	Fe-Mg in ol	Dohmen & Chakraborty (2007)		F_5C_C2						2010.23	0.00613686	0.00387209	7.47164	Pankhurst et al. (2018)
Eyjafjallajokull	Fimmvorduháls 2010	Fe-Mg in ol	Dohmen & Chakraborty (2007)		F_7D_H2						2010.22	0.000607478	0.000383293	13.4323	Pankhurst et al. (2018)
Eyjafjallajokull	Fimmvorduháls 2010	Fe-Mg in ol	Dohmen & Chakraborty (2007)		F_5C_G7						2010.22	0.00746068	0.00470737	26.6702	Pankhurst et al. (2018)
Eyjafjallajokull	Fimmvorduháls 2010	Fe-Mg in ol	Dohmen & Chakraborty (2007)		F_5C_C3						2010.22	0.00780937	0.00492738	33.9159	Pankhurst et al. (2018)
Eyjafjallajokull	Fimmvorduháls 2010	Fe-Mg in ol	Dohmen & Chakraborty (2007)		F_7D_A7						2010.22	0.00149558	0.00094365	123.179	Pankhurst et al. (2018)
Eyjafjallajokull	Fimmvorduháls 2010	Fe-Mg in ol	Dohmen & Chakraborty (2007)		F_5C_C6						2010.22	0.00830855	0.00524234	29.3318	Pankhurst et al. (2018)
Eyjafjallajokull	Fimmvorduháls 2010	Fe-Mg in ol	Dohmen & Chakraborty (2007)		F_5C_D3						2010.22	0.0084772	0.00534875	70.1227	Pankhurst et al. (2018)
Eyjafjallajokull	Fimmvorduháls 2010	Fe-Mg in ol	Dohmen & Chakraborty (2007)		F_7D_G6						2010.22	0.00331576	0.0020921	9.47324	Pankhurst et al. (2018)
Eyjafjallajokull	Fimmvorduháls 2010	Fe-Mg in ol	Dohmen & Chakraborty (2007)		F_5C_D4						2010.22	0.0100184	0.00632117	40.3859	Pankhurst et al. (2018)
Eyjafjallajokull	Fimmvorduháls 2010	Fe-Mg in ol	Dohmen & Chakraborty (2007)		F_7D_E4						2010.22	0.00380624	0.00240157	59.8324	Pankhurst et al. (2018)
Eyjafjallajokull	Fimmvorduháls 2010	Fe-Mg in ol	Dohmen & Chakraborty (2007)		F_5C_D2						2010.22	0.0112162	0.00707693	11.8241	Pankhurst et al. (2018)
Eyjafjallajokull	Fimmvorduháls 2010	Fe-Mg in ol	Dohmen & Chakraborty (2007)		F_5C_A5b						2010.22	0.0112574	0.00710291	287.23	Pankhurst et al. (2018)
Eyjafjallajokull	Fimmvorduháls 2010	Fe-Mg in ol	Dohmen & Chakraborty (2007)		F_7D_B3						2010.22	0.00487862	0.0030782	380.879	Pankhurst et al. (2018)
Eyjafjallajokull	Fimmvorduháls 2010	Fe-Mg in ol	Dohmen & Chakraborty (2007)		F_7D_C7						2010.22	0.00540384	0.00340959	22.5161	Pankhurst et al. (2018)
Eyjafjallajokull	Fimmvorduháls 2010	Fe-Mg in ol	Dohmen & Chakraborty (2007)		F_5C_C4						2010.21	0.01258	0.00793746	15.4307	Pankhurst et al. (2018)
Eyjafjallajokull	Fimmvorduháls 2010	Fe-Mg in ol	Dohmen & Chakraborty (2007)		F_7D_C4						2010.21	0.00745616	0.00470452	9.1964	Pankhurst et al. (2018)
Eyjafjallajokull	Fimmvorduháls 2010	Fe-Mg in ol	Dohmen & Chakraborty (2007)		F_3C_B5						2010.21	0.0219717	0.0138632	126.442	Pankhurst et al. (2018)
Eyjafjallajokull	Fimmvorduháls 2010	Fe-Mg in ol	Dohmen & Chakraborty (2007)		F_7D_C5						2010.21	0.00798979	0.00504122	26.8712	Pankhurst et al. (2018)
Eyjafjallajokull	Fimmvorduháls 2010	Fe-Mg in ol	Dohmen & Chakraborty (2007)		F_7D_G8						2010.21	0.00881096	0.00555934	14.4013	Pankhurst et al. (2018)
Eyjafjallajokull	Fimmvorduháls 2010	Fe-Mg in ol	Dohmen & Chakraborty (2007)		F_3C_E1b						2010.21	0.0235987	0.0148898	32.338	Pankhurst et al. (2018)
Eyjafjallajokull	Fimmvorduháls 2010	Fe-Mg in ol	Dohmen & Chakraborty (2007)		F_7D_F8						2010.21	0.00959916	0.00605666	27.9905	Pankhurst et al. (2018)
Eyjafjallajokull	Fimmvorduháls 2010	Fe-Mg in ol	Dohmen & Chakraborty (2007)		F_5C_E4						2010.21	0.0170573	0.0107624	11.281	Pankhurst et al. (2018)
Eyjafjallajokull	Fimmvorduháls 2010	Fe-Mg in ol	Dohmen & Chakraborty (2007)		F_7D_F1						2010.21	0.0107846	0.00680465	86.21	Pankhurst et al. (2018)
Eyjafjallajokull	Fimmvorduháls 2010	Fe-Mg in ol	Dohmen & Chakraborty (2007)		F_5C_D5						2010.2	0.0180318	0.0113773	14.1226	Pankhurst et al. (2018)
Eyjafjallajokull	Fimmvorduháls 2010	Fe-Mg in ol	Dohmen & Chakraborty (2007)		F_2CT_D8						2010.2	0.0366608	0.0231314	11.8019	Pankhurst et al. (2018)
Eyjafjallajokull	Fimmvorduháls 2010	Fe-Mg in ol	Dohmen & Chakraborty (2007)		F_7D_F2						2010.2	0.013106	0.00826934	24.5374	Pankhurst et al. (2018)
Eyjafjallajokull	Fimmvorduháls 2010	Fe-Mg in ol	Dohmen & Chakraborty (2007)		F_3C_C5						2010.2	0.0275337	0.0173726	2081.96	Pankhurst et al. (2018)
Eyjafjallajokull	Fimmvorduháls 2010	Fe-Mg in ol	Dohmen & Chakraborty (2007)		F_7D_D6						2010.2	0.0132182	0.00834012	111.041	Pankhurst et al. (2018)
Eyjafjallajokull	Fimmvorduháls 2010	Fe-Mg in ol	Dohmen & Chakraborty (2007)		F_2CT_G6						2010.2	0.0373167	0.0235453	191.309	Pankhurst et al. (2018)
Eyjafjallajokull	Fimmvorduháls 2010	Fe-Mg in ol	Dohmen & Chakraborty (2007)		F_5C_G3						2010.2	0.020294	0.0128047	19.5721	Pankhurst et al. (2018)
Eyjafjallajokull	Fimmvorduháls 2010	Fe-Mg in ol	Dohmen & Chakraborty (2007)		F_5C_F4						2010.2	0.0204943	0.012931	59.0548	Pankhurst et al. (2018)
Eyjafjallajokull	Fimmvorduháls 2010	Fe-Mg in ol	Dohmen & Chakraborty (2007)		F_7D_F5						2010.2	0.0142431	0.00898681	74.5441	Pankhurst et al. (2018)
Eyjafjallajokull	Fimmvorduháls 2010	Fe-Mg in ol	Dohmen & Chakraborty (2007)		F_5C_D1						2010.2	0.0224489	0.0141643	6.58485	Pankhurst et al. (2018)
Eyjafjallajokull	Fimmvorduháls 2010	Fe-Mg in ol	Dohmen & Chakraborty (2007)		F_3C_E2						2010.19	0.0341359	0.0215383	3.21813	Pankhurst et al. (2018)
Eyjafjallajokull	Fimmvorduháls 2010	Fe-Mg in ol	Dohmen & Chakraborty (2007)		F_2CT_F4						2010.19	0.0439518	0.0277317	58.761	Pankhurst et al. (2018)
Eyjafjallajokull	Fimmvorduháls 2010	Fe-Mg in ol	Dohmen & Chakraborty (2007)		F_5C_C7						2010.19	0.026339	0.0166188	836.98	Pankhurst et al. (2018)
Eyjafjallajokull	Fimmvorduháls 2010	Fe-Mg in ol	Dohmen & Chakraborty (2007)		F_5C_E6						2010.19	0.0277145	0.0174866	8.598	Pankhurst et al. (2018)
Eyjafjallajokull	Fimmvorduháls 2010	Fe-Mg in ol	Dohmen & Chakraborty (2007)		F_2CT_J7						2010.18	0.047296	0.0298418	6.05025	Pankhurst et al. (2018)
Eyjafjallajokull	Fimmvorduháls 2010	Fe-Mg in ol	Dohmen & Chakraborty (2007)		F_3C_E3						2010.18	0.0393706	0.0248411	7.0008	Pankhurst et al. (2018)
Eyjafjallajokull	Fimmvorduháls 2010	Fe-Mg in ol	Dohmen & Chakraborty (2007)		F_7D_C2						2010.18	0.0265975	0.0167819	7.17188	Pankhurst et al. (2018)
Eyjafjallajokull	Fimmvorduháls 2010	Fe-Mg in ol	Dohmen & Chakraborty (2007)		F_5C_A7						2010.17	0.0392975	0.024795	1.88006	Pankhurst et al. (2018)
Eyjafjallajokull	Fimmvorduháls 2010	Fe-Mg in ol	Dohmen & Chakraborty (2007)		F_7D_A3						2010.15	0.0414036	0.0261239	1.38868	Pankhurst et al. (2018)
Eyjafjallajokull	Fimmvorduháls 2010	Fe-Mg in ol	Dohmen & Chakraborty (2007)		F_7D_D7						2010.15	0.0424917	0.0268105	10.8681	Pankhurst et al. (2018)
Eyjafjallajokull	Fimmvorduháls 2010	Fe-Mg in ol	Dohmen & Chakraborty (2007)		F_5C_A6						2010.15	0.0504648	0.0318411	7.5651	Pankhurst et al. (2018)
Eyjafjallajokull	Fimmvorduháls 2010	Fe-Mg in ol	Dohmen & Chakraborty (2007)		F_3C_C2						2010.15	0.0585644	0.0369516	135.301	Pankhurst et al. (2018)
Eyjafjallajokull	Fimmvorduháls 2010	Fe-Mg in ol	Dohmen & Chakraborty (2007)		F_5C_G1						2010.14	0.0541695	0.0341786	3.26929	Pankhurst et al. (2018)
Eyjafjallajokull	Fimmvorduháls 2010	Fe-Mg in ol	Dohmen & Chakraborty (2007)		F_3C_A8						2010.14	0.062351	0.0393408	69.8368	Pankhurst et al. (2018)
Eyjafjallajokull	Fimmvorduháls 2010	Fe-Mg in ol	Dohmen & Chakraborty (2007)		F_3C_B2						2010.14	0.0635887	0.0401217	9.55505	Pankhurst et al. (2018)
Eyjafjallajokull	Fimmvorduháls 2010	Fe-Mg in ol	Dohmen & Chakraborty (2007)		F_5C_B5						2010.14	0.056462	0.0356251	13.3546	Pankhurst et al. (2018)
Eyjafjallajokull	Fimmvorduháls 2010	Fe-Mg in ol	Dohmen & Chakraborty (2007)		F_5C_A1						2010.14	0.0570047	0.0359675	21.7909	Pankhurst et al. (2018)
Eyjafjallajokull	Fimmvorduháls 2010	Fe-Mg in ol	Dohmen & Chakraborty (2007)		F_2CT_F8						2010.14	0.0763629	0.0481817	6.83084	Pankhurst et al. (2018)
Eyjafjallajokull	Fimmvorduháls 2010	Fe-Mg in ol	Dohmen & Chakraborty (2007)		F_3C_H7						2010.13	0.0683828	0.0431466	7.23467	Pankhurst et al. (2018)
Eyjafjallajokull	Fimmvorduháls 2010	Fe-Mg in ol	Dohmen & Chakraborty (2007)		F_7D_G5						2010.12	0.0594422	0.0375055	2.15744	Pankhurst et al. (2018)
Eyjafjallajokull	Fimmvorduháls 2010	Fe-Mg in ol	Dohmen & Chakraborty (2007)		F_5C_F7						2010.12	0.0660738	0.0416898	53.3134	Pankhurst et al. (2018)
Eyjafjallajokull	Fimmvorduháls 2010	Fe-Mg in ol	Dohmen & Chakraborty (2007)		F_3C_E6						2010.12	0.0747929	0.0471911	16.7311	Pankhurst et al. (2018)
Eyjafjallajokull	Fimmvorduháls 2010	Fe-Mg in ol	Dohmen & Chakraborty (2007)		F_5C_F3						2010.11	0.0718049	0.0453058	2.35377	Pankhurst et al. (2018)
Eyjafjallajokull	Fimmvorduháls 2010	Fe-Mg in ol	Dohmen & Chakraborty (2007)		F_2CT_H3						2010.11	0.0903407	0.0570011	13.0118	Pankhurst et al. (2018)
Eyjafjallajokull	Fimmvorduháls 2010	Fe-Mg in ol	Dohmen & Chakraborty (2007)		F_3C_H4						2010.1	0.084761	0.0534806	2.93087	Pankhurst et al. (2018)
Eyjafjallajokull	Fimmvorduháls 2010	Fe-Mg in ol	Dohmen & Chakraborty (2007)		F_7D_H5						2010.1	0.0712541	0.0449583	12.9231	Pankhurst et al. (2018)
Eyjafjallajokull	Fimmvorduháls 2010	Fe-Mg in ol	Dohmen & Chakraborty (2007)		F_3C_F1						2010.1	0.085753	0.0541065	153.762	Pankhurst et al. (2018)
Eyjafjallajokull	Fimmvorduháls 2010	Fe-Mg in ol	Dohmen & Chakraborty (2007)		F_5C_B1						2010.1	0.081437	0.0513833	3.19946	Pankhurst et al. (2018)
Eyjafjallajokull	Fimmvorduháls 2010	Fe-Mg in ol	Dohmen & Chakraborty (2007)		F_2CT_H4						2010.09	0.101607	0.0641095	4.65089	Pankhurst et al. (2018)
Eyjafjallajokull	Fimmvorduháls 2010	Fe-Mg in ol	Dohmen & Chakraborty (2007)		F_3C_E8						2010.09	0.093705	0.0591239	6.90356	Pankhurst et al. (2018)
Eyjafjallajokull	Fimmvorduháls 2010	Fe-Mg in ol	Dohmen & Chakraborty (2007)		F_7D_G2						2010.08	0.081897	0.0516735	4.52407	Pankhurst et al. (2018)
Eyjafjallajokull	Fimmvorduháls 2010	Fe-Mg in ol	Dohmen & Chakraborty (2007)		F_2CT_I4						2010.08	0.110854	0.0699442	2.40347	Pankhurst et al. (2018)
Eyjafjallajokull	Fimmvorduháls 2010	Fe-Mg in ol	Dohmen & Chakraborty (2007)		F_2CT_I3						2010.07	0.115639	0.0729636	2.47124	Pankhurst et al. (2018)
Eyjafjallajokull	Fimmvorduháls 2010	Fe-Mg in ol	Dohmen & Chakraborty (2007)		F_7D_H6						2010.04	0.106729	0.0673417	0.781795	Pankhurst et al. (2018)
Eyjafjallajokull	Fimmvorduháls 2010	Fe-Mg in ol	Dohmen & Chakraborty (2007)		F_2CT_I2						2010.02	0.14385	0.0907631	0.903869	Pankhurst et al. (2018)
Eyjafjallajokull	Fimmvorduháls 2010	Fe-Mg in ol	Dohmen & Chakraborty (2007)		F_5C_F5						2010.01	0.131876	0.0832081	2.09199	Pankhurst et al. (2018)
Eyjafjallajokull	Fimmvorduháls 2010	Fe-Mg in ol	Dohmen & Chakraborty (2007)		F_7D_F4						2010	0.130366	0.0822556	2.4133	Pankhurst et al. (2018)
Eyjafjallajokull	Fimmvorduháls 2010	Fe-Mg in ol	Dohmen & Chakraborty (2007)		F_5C_E2						2009.99	0.144391	0.0911046	1.55302	Pankhurst et al. (2018)
Eyjafjallajokull	Fimmvorduháls 2010	Fe-Mg in ol	Dohmen & Chakraborty (2007)		F_3C_H5						2009.97	0.160679	0.101382	1.429	Pankhurst et al. (2018)
Eyjafjallajokull	Fimmvorduháls 2010	Fe-Mg in ol	Dohmen & Chakraborty (2007)		F_2CT_B3						2009.96	0.176041	0.111074	2.0576	Pankhurst et al. (2018)
Eyjafjallajokull	Fimmvorduháls 2010	Fe-Mg in ol	Dohmen & Chakraborty (2007)		F_2CT_G8						2009.96	0.176282	0.111226	49.0832	Pankhurst et al. (2018)
Eyjafjallajokull	Fimmvorduháls 2010	Fe-Mg in ol	Dohmen & Chakraborty (2007)		F_7D_F7						2009.95	0.159519	0.10065	1.6259	Pankhurst et al. (2018)
Eyjafjallajokull	Fimmvorduháls 2010	Fe-Mg in ol	Dohmen & Chakraborty (2007)		F_5C_C5						2009.91	0.191003	0.120515	0.471638	Pankhurst et al. (2018)
Eyjafjallajokull	Fimmvorduháls 2010	Fe-Mg in ol	Dohmen & Chakraborty (2007)		F_2CT_F7ii						2009.91	0.209792	0.13237	10.1747	Pankhurst et al. (2018)
Eyjafjallajokull	Fimmvorduháls 2010	Fe-Mg in ol	Dohmen & Chakraborty (2007)		F_7D_A4						2009.9	0.187162	0.118091	8.40513	Pankhurst et al. (2018)
Eyjafjallajokull	Fimmvorduháls 2010	Fe-Mg in ol	Dohmen & Chakraborty (2007)		F_2CT_I5						2009.89	0.219674	0.138605	1.39531	Pankhurst et al. (2018)
Eyjafjallajokull	Fimmvorduháls 2010	Fe-Mg in ol	Dohmen & Chakraborty (2007)		F_2CT_I6						2009.76	0.29619	0.186883	0.154556	Pankhurst et al. (2018)
Eyjafjallajokull	Fimmvorduháls 2010	Fe-Mg in ol	Dohmen & Chakraborty (2007)		F_2CT_F3						2009.72	0.322015	0.203178	0.457925	Pankhurst et al. (2018)
Eyjafjallajokull	Fimmvorduháls 2010	Fe-Mg in ol	Dohmen & Chakraborty (2007)		F_3C_A4						2009.71	0.314463	0.198413	5.73217	Pankhurst et al. (2018)
Eyjafjallajokull	Fimmvorduháls 2010	Fe-Mg in ol	Dohmen & Chakraborty (2007)		F_7D_F3						2009.71	0.301317	0.190118	9.27222	Pankhurst et al. (2018)
Eyjafjallajokull	Fimmvorduháls 2010	Fe-Mg in ol	Dohmen & Chakraborty (2007)		F_7D_F6						2009.63	0.350026	0.220851	0.242787	Pankhurst et al. (2018)
Eyjafjallajokull	Fimmvorduháls 2010	Fe-Mg in ol	Dohmen & Chakraborty (2007)		F_7D_E7						2009.53	0.405597	0.255915	0.212806	Pankhurst et al. (2018)
Eyjafjallajokull	Fimmvorduháls 2010	Fe-Mg in ol	Dohmen & Chakraborty (2007)		F_2CT_F7						2009.48	0.460173	0.29035	0.387238	Pankhurst et al. (2018)
Eyjafjallajokull	Fimmvorduháls 2010	Fe-Mg in ol	Dohmen & Chakraborty (2007)		F_2CT_E6						2009.05	0.710704	0.448424	0.0472037	Pankhurst et al. (2018)
Eyjafjallajokull	Fimmvorduháls 2010	Fe-Mg in ol	Dohmen & Chakraborty (2007)		F_7D_B6						2008.89	0.782732	0.493871	0.123103	Pankhurst et al. (2018)
Eyjafjallajokull	Fimmvorduháls 2010	Fe-Mg in ol	Dohmen & Chakraborty (2007)		F_3C_G4						2008.18	1.20971	0.763273	0.0286654	Pankhurst et al. (2018)
Laki	Phase I-II, 1783	Fe-Mg in ol	Dohmen & Chakraborty (2007)		MHL07A-ol7		Rim	5.35457e-05	0.000173607	4.09236e-05	0.0195442	0.0633665	0.0149371		Hartley et al. (2016)
Laki	Phase I-II, 1783	Fe-Mg in ol	Dohmen & Chakraborty (2007)		MHL07A-ol10a		Rim	0.000160069	0.000515542	0.000122145	0.0584252	0.188173	0.0445828	203.779	Hartley et al. (2016)
Laki	Phase I-II, 1783	Fe-Mg in ol	Dohmen & Chakraborty (2007)		MHL07A-ol10b		Rim	0.000617318	0.00200768	0.000472144	0.225321	0.732802	0.172333	47.4735	Hartley et al. (2016)
Laki	Phase I-II, 1783	Fe-Mg in ol	Dohmen & Chakraborty (2007)		MHL07A-ol10c		Rim	0.00104539	0.00360036	0.000810158	0.381569	1.31413	0.295708	50.7088	Hartley et al. (2016)
Laki	Phase I-II, 1783	Fe-Mg in ol	Dohmen & Chakraborty (2007)		MHL07A-ol10-full		Rim	0.00222158	0.00717531	0.00169636	0.810876	2.61899	0.619172	18.4556	Hartley et al. (2016)
Laki	Phase I-II, 1783	Fe-Mg in ol	Dohmen & Chakraborty (2007)		MHL07A-ol6		Rim	0.00263469	0.00832104	0.00200109	0.961661	3.03718	0.730396	52.5458	Hartley et al. (2016)
Laki	Phase I-II, 1783	Fe-Mg in ol	Dohmen & Chakraborty (2007)		MHL07A-ol25		Rim	0.00297945	0.00975912	0.00228258	1.0875	3.56208	0.833141	62.9635	Hartley et al. (2016)
Laki	Phase I-II, 1783	Fe-Mg in ol	Dohmen & Chakraborty (2007)		MHL07A-ol45		Rim	0.00320798	0.0103466	0.00244874	1.17091	3.77652	0.893792	94.9854	Hartley et al. (2016)
Laki	Phase I-II, 1783	Fe-Mg in ol	Dohmen & Chakraborty (2007)		MHL07A-ol27		Rim	0.00328956	0.0107904	0.00252101	1.20069	3.9385	0.920168	266.077	Hartley et al. (2016)
Laki	Phase I-II, 1783	Fe-Mg in ol	Dohmen & Chakraborty (2007)		MHL07-ol20		Rim	0.00477166	0.0153335	0.00363917	1.74165	5.59671	1.3283	14.6463	Hartley et al. (2016)
Laki	Phase I-II, 1783	Fe-Mg in ol	Dohmen & Chakraborty (2007)		MHL07A-ol62		Rim	0.00658155	0.0224005	0.00508694	2.40226	8.17619	1.85673	11.9937	Hartley et al. (2016)
Laki	Phase I-II, 1783	Fe-Mg in ol	Dohmen & Chakraborty (2007)		MHL07-ol5		Rim	0.00743434	0.0246636	0.00571244	2.71353	9.0022	2.08504	25.4543	Hartley et al. (2016)
Laki	Phase I-II, 1783	Fe-Mg in ol	Dohmen & Chakraborty (2007)		MHL07A-ol3		Rim	0.00767764	0.0250835	0.00587837	2.80234	9.15549	2.14561	89.2184	Hartley et al. (2016)
Laki	Phase I-II, 1783	Fe-Mg in ol	Dohmen & Chakraborty (2007)		MHL07A-ol28		Rim	0.00859036	0.0268	0.00650521	3.13548	9.782	2.3744	23.7831	Hartley et al. (2016)
Laki	Phase I-II, 1783	Fe-Mg in ol	Dohmen & Chakraborty (2007)		MHL07A-ol12		Rim	0.00898252	0.0302196	0.00692432	3.27862	11.0301	2.52738	55.3526	Hartley et al. (2016)
Laki	Phase I-II, 1783	Fe-Mg in ol	Dohmen & Chakraborty (2007)		MHL07A-ol55		Rim	0.00959077	0.0310779	0.00732901	3.50063	11.3434	2.67509	35.6881	Hartley et al. (2016)
Laki	Phase I-II, 1783	Fe-Mg in ol	Dohmen & Chakraborty (2007)		MHL07A-ol57		Rim	0.00987464	0.0317173	0.00753023	3.60424	11.5768	2.74853	76.4696	Hartley et al. (2016)
Laki	Phase I-II, 1783	Fe-Mg in ol	Dohmen & Chakraborty (2007)		MHL07A-ol4		Rim	0.010866	0.0354427	0.00831636	3.96609	12.9366	3.03547	21.8966	Hartley et al. (2016)
Laki	Phase I-II, 1783	Fe-Mg in ol	Dohmen & Chakraborty (2007)		MHL07-ol14		Rim	0.0112159	0.0364648	0.00857758	4.0938	13.3096	3.13082	62.0389	Hartley et al. (2016)
Laki	Phase I-II, 1783	Fe-Mg in ol	Dohmen & Chakraborty (2007)		MHL07-ol17a		Rim	0.0114285	0.0383722	0.00880584	4.17141	14.0058	3.21413	102.092	Hartley et al. (2016)
Laki	Phase I-II, 1783	Fe-Mg in ol	Dohmen & Chakraborty (2007)		MHL07A-ol26		Rim	0.0117396	0.0385017	0.00899645	4.28494	14.0531	3.28371	69.7868	Hartley et al. (2016)
Laki	Phase I-II, 1783	Fe-Mg in ol	Dohmen & Chakraborty (2007)		MHL07A-ol23a		Rim	0.0133567	0.043964	0.0102443	4.87518	16.0469	3.73918	13.4236	Hartley et al. (2016)
Laki	Phase I-II, 1783	Fe-Mg in ol	Dohmen & Chakraborty (2007)		MHL07A-ol50		Rim	0.0156117	0.0523059	0.0120232	5.69828	19.0916	4.38846	9.62591	Hartley et al. (2016)
Laki	Phase I-II, 1783	Fe-Mg in ol	Dohmen & Chakraborty (2007)		MHL07A-ol24		Rim	0.0161753	0.051036	0.0122825	5.90397	18.6281	4.4831	38.5207	Hartley et al. (2016)
Laki	Phase I-II, 1783	Fe-Mg in ol	Dohmen & Chakraborty (2007)		MHL07A-ol19		Rim	0.0162855	0.0522972	0.0124184	5.9442	19.0885	4.53271	196.918	Hartley et al. (2016)
Laki	Phase I-II, 1783	Fe-Mg in ol	Dohmen & Chakraborty (2007)		MHL07A-ol54		Rim	0.0168474	0.055354	0.0129162	6.14929	20.2042	4.71442	38.633	Hartley et al. (2016)
Laki	Phase I-II, 1783	Fe-Mg in ol	Dohmen & Chakraborty (2007)		MHL07A-ol13a		Rim	0.0173083	0.0556413	0.0132017	6.31755	20.3091	4.81862	47.09	Hartley et al. (2016)
Laki	Phase I-II, 1783	Fe-Mg in ol	Dohmen & Chakraborty (2007)		MHL07A-ol5		Rim	0.0188035	0.0622144	0.0144394	6.8633	22.7083	5.27039	14.5179	Hartley et al. (2016)
Laki	Phase I-II, 1783	Fe-Mg in ol	Dohmen & Chakraborty (2007)		MHL07A-ol49		Rim	0.019458	0.0610141	0.0147531	7.10215	22.2701	5.38487	33.1709	Hartley et al. (2016)
Laki	Phase I-II, 1783	Fe-Mg in ol	Dohmen & Chakraborty (2007)		MHL07A-ol11		Rim	0.0196708	0.0677632	0.0152453	7.17985	24.7336	5.56453	101.977	Hartley et al. (2016)
Laki	Phase I-II, 1783	Fe-Mg in ol	Dohmen & Chakraborty (2007)		MHL07A-ol2		Rim	0.0205798	0.067892	0.0157926	7.51161	24.7806	5.76431	23.8821	Hartley et al. (2016)
Laki	Phase I-II, 1783	Fe-Mg in ol	Dohmen & Chakraborty (2007)		MHL07A-ol21A		Rim	0.0236755	0.0752889	0.0180116	8.64157	27.4804	6.57422	7.01185	Hartley et al. (2016)
Laki	Phase I-II, 1783	Fe-Mg in ol	Dohmen & Chakraborty (2007)		MHL07-ol4		Rim	0.0253	0.0868769	0.0195939	9.23451	31.7101	7.15179	13.3625	Hartley et al. (2016)
Laki	Phase I-II, 1783	Fe-Mg in ol	Dohmen & Chakraborty (2007)		MHL07A-ol13b		Rim	0.0255055	0.079832	0.0193298	9.30949	29.1387	7.05538	105.67	Hartley et al. (2016)
Laki	Phase I-II, 1783	Fe-Mg in ol	Dohmen & Chakraborty (2007)		MHL07-ol18		Rim	0.0270051	0.0875524	0.0206391	9.85685	31.9566	7.53326	14.4753	Hartley et al. (2016)
Laki	Phase I-II, 1783	Fe-Mg in ol	Dohmen & Chakraborty (2007)		MHL07A-ol37_adjacent-to-MI		Rim	0.0320284	0.103471	0.0244578	11.6904	37.767	8.92709	4.32127	Hartley et al. (2016)
Laki	Phase I-II, 1783	Fe-Mg in ol	Dohmen & Chakraborty (2007)		MHL07A-ol22		Rim	0.0404259	0.133949	0.0310538	14.7555	48.8913	11.3346	2.58496	Hartley et al. (2016)
Laki	Phase I-II, 1783	Fe-Mg in ol	Dohmen & Chakraborty (2007)		MHL07A-ol47		Rim	0.0432541	0.142279	0.0331701	15.7877	51.9318	12.1071	7.67534	Hartley et al. (2016)
Laki	Phase I-II, 1783	Fe-Mg in ol	Dohmen & Chakraborty (2007)		MHL07A-ol43		Rim	0.044192	0.145511	0.0338973	16.1301	53.1115	12.3725	23.1427	Hartley et al. (2016)
Laki	Phase I-II, 1783	Fe-Mg in ol	Dohmen & Chakraborty (2007)		MHL07-ol17b		Rim	0.0488336	0.168154	0.0378435	17.8243	61.3762	13.8129	4.6767	Hartley et al. (2016)
Laki	Phase I-II, 1783	Fe-Mg in ol	Dohmen & Chakraborty (2007)		MHL07A-ol44		Rim	0.0502393	0.172135	0.0388891	18.3373	62.8295	14.1945	15.4427	Hartley et al. (2016)
Laki	Phase I-II, 1783	Fe-Mg in ol	Dohmen & Chakraborty (2007)		MHL07-ol19		Rim	0.0554184	0.181856	0.0424748	20.2277	66.3776	15.5033	4.19126	Hartley et al. (2016)
Laki	Phase I-II, 1783	Fe-Mg in ol	Dohmen & Chakraborty (2007)		MHL07A-ol34		Rim	0.0633514	0.212457	0.0488	23.1233	77.5469	17.812	2.73631	Hartley et al. (2016)
Laki	Phase I-II, 1783	Fe-Mg in ol	Dohmen & Chakraborty (2007)		MHL07-ol11		Rim	0.070179	0.235868	0.0540864	25.6153	86.0916	19.7415	3.17935	Hartley et al. (2016)
Laki	Phase I-II, 1783	Fe-Mg in ol	Dohmen & Chakraborty (2007)		MHL07A-ol37		Rim	0.072801	0.235192	0.0555929	26.5723	85.8452	20.2914	8.27907	Hartley et al. (2016)
Laki	Phase I-II, 1783	Fe-Mg in ol	Dohmen & Chakraborty (2007)		MHL07A-ol15a		Rim	0.0806283	0.255325	0.0612776	29.4293	93.1936	22.3663	2.77325	Hartley et al. (2016)
Laki	Phase I-II, 1783	Fe-Mg in ol	Dohmen & Chakraborty (2007)		MHL07A-ol23b		Rim	0.0815467	0.254281	0.0617453	29.7646	92.8125	22.537	23.635	Hartley et al. (2016)
Laki	Phase I-II, 1783	Fe-Mg in ol	Dohmen & Chakraborty (2007)		MHL07-ol6		Rim	0.0818275	0.265547	0.0625522	29.8671	96.9247	22.8316	77.3076	Hartley et al. (2016)
Laki	Phase I-II, 1783	Fe-Mg in ol	Dohmen & Chakraborty (2007)		MHL07A-ol53		Rim	0.10271	0.337928	0.078769	37.4892	123.344	28.7507	1.03949	Hartley et al. (2016)
Laki	Phase I-II, 1783	Fe-Mg in ol	Dohmen & Chakraborty (2007)		MHL07A-ol33a		Rim	0.118077	0.378089	0.0899774	43.0982	138.002	32.8417	1.41257	Hartley et al. (2016)
Laki	Phase I-II, 1783	Fe-Mg in ol	Dohmen & Chakraborty (2007)		MHL07-ol+31		Rim	0.139063	0.454944	0.106507	50.7581	166.055	38.8751	1.03437	Hartley et al. (2016)
Laki	Phase I-II, 1783	Fe-Mg in ol	Dohmen & Chakraborty (2007)		MHL07A-ol64		Rim	0.169189	0.548039	0.129278	61.7539	200.034	47.1866	0.720559	Hartley et al. (2016)
Laki	Phase I-II, 1783	Fe-Mg in ol	Dohmen & Chakraborty (2007)		MHL07A-ol15b		Rim	0.30783	0.973518	0.233877	112.358	355.334	85.3652	0.156571	Hartley et al. (2016)
Laki	Phase I-II, 1783	Fe-Mg in ol	Dohmen & Chakraborty (2007)		MHL07A-ol21B		Rim	0.318526	1.04875	0.244321	116.262	382.793	89.1771	2.02957	Hartley et al. (2016)
Laki	Phase I-II, 1783	Fe-Mg in ol	Dohmen & Chakraborty (2007)		MHL07A-ol59		Rim	0.337713	1.06247	0.256259	123.265	387.803	93.5347	1.13135	Hartley et al. (2016)
Laki	Phase I-II, 1783	Fe-Mg in ol	Dohmen & Chakraborty (2007)		MHL07-ol2a		Rim	0.529264	1.74167	0.405914	193.181	635.71	148.159	0.113323	Hartley et al. (2016)
Laki	Phase I-II, 1783	Fe-Mg in ol	Dohmen & Chakraborty (2007)		MHL07-ol2b		Rim	0.633465	2.02226	0.482366	231.215	738.127	176.064	0.20832	Hartley et al. (2016)
Laki	Phase I-II, 1783	Fe-Mg in ol	Dohmen & Chakraborty (2007)		MHL07-ol28		Rim	0.738774	2.34095	0.561554	269.652	854.446	204.967	0.20613	Hartley et al. (2016)
Laki	Phase I-II, 1783	Fe-Mg in ol	Dohmen & Chakraborty (2007)		MHL07A-ol35		Rim	1.28078	4.10062	0.975952	467.484	1496.72	356.222	0.0400498	Hartley et al. (2016)
Irazu	1963-65	Ni in ol	Petry et al. (2004)		IZ1013-ol17		Rim	0.876	15	0.5	319.74	5475	182.5		Ruprecht & Plank (2013)
Irazu	1963-65	Ni in ol	Petry et al. (2004)		IZ1013-ol53		Rim	1.028	1.6	0.5	375.22	584	182.5	36.1388	Ruprecht & Plank (2013)
Irazu	1963-65	Ni in ol	Petry et al. (2004)		IZ1013-ol26		Rim	1.072	7	0.6	391.28	2555	219	124.843	Ruprecht & Plank (2013)
Irazu	1963-65	Ni in ol	Petry et al. (2004)		IZ1013-ol22		Rim	1.184	2	0.6	432.16	730	219	49.0455	Ruprecht & Plank (2013)
Irazu	1963-65	Ni in ol	Petry et al. (2004)		IZ1011-ol15		Rim	1.2	6.1	0.7	438	2226.5	255.5	343.318	Ruprecht & Plank (2013)
Irazu	1963-65	Ni in ol	Petry et al. (2004)		IZ1011-ol162		Rim	3.192	14.5	1.8	1165.08	5292.5	657	2.75758	Ruprecht & Plank (2013)
Irazu	1963-65	Ni in ol	Petry et al. (2004)		IZ1011-ol4		Rim	3.284	10.2	1.8	1198.66	3723	657	59.7075	Ruprecht & Plank (2013)
Irazu	1963-65	Ni in ol	Petry et al. (2004)		IZ1013-ol201		Rim	3.808	5.8	1.8	1389.92	2117	657	10.483	Ruprecht & Plank (2013)
Irazu	1963-65	Ni in ol	Petry et al. (2004)		IZ1011-ol5		Rim	7.024	13	3.4	2563.76	4745	1241	1.70805	Ruprecht & Plank (2013)
Irazu	1963-65	Ni in ol	Petry et al. (2004)		IZ1011-ol1		Rim	7.396	16.8	3.8	2699.54	6132	1387	14.7664	Ruprecht & Plank (2013)
Irazu	1963-65	Ni in ol	Petry et al. (2004)		IZ1013-ol44		Rim	61.3	90.9	28	22374.5	33178.5	10220	0.101905	Ruprecht & Plank (2013)
Stromboli	Post-Pizzo	Fe-Mg in cpx	Dimanov & Sautter (2000)	STR277	CPX12	dt2	Inner rim-band	0.001	0.001	0.001	0.365	0.365	0.365		Petrone et al. (2018)
Stromboli	Post-Pizzo	Fe-Mg in cpx	Dimanov & Sautter (2000)	STR277	CPX13	dt2	Inner rim-band	0.002	0.002	0.002	0.73	0.73	0.73	2866.6	Petrone et al. (2018)
Stromboli	Post-Pizzo	Fe-Mg in cpx	Dimanov & Sautter (2000)	STR277	CPX7	dt4	Inner rim-band	0.003	0.002	0.002	1.095	0.73	0.73	2866.6	Petrone et al. (2018)
Stromboli	Post-Pizzo	Fe-Mg in cpx	Dimanov & Sautter (2000)	STR277	CPX103	dt2	Inner rim-band	0.003	0.002	0.002	1.095	0.73	0.73	→∞	Petrone et al. (2018)
Stromboli	Post-Pizzo	Fe-Mg in cpx	Dimanov & Sautter (2000)	STR277	CPX111	dt2	Inner rim-band	0.005	0.002	0.002	1.825	0.73	0.73	1433.3	Petrone et al. (2018)
Stromboli	Post-Pizzo	Fe-Mg in cpx	Dimanov & Sautter (2000)	STR277	CPX115	dt4	Inner rim-band	0.005	0.007	0.007	1.825	2.555	2.555	→∞	Petrone et al. (2018)
Stromboli	Post-Pizzo	Fe-Mg in cpx	Dimanov & Sautter (2000)	STR277	CPX14	dt2	Inner rim-band	0.007	0.004	0.004	2.555	1.46	1.46	1433.3	Petrone et al. (2018)
Stromboli	Post-Pizzo	Fe-Mg in cpx	Dimanov & Sautter (2000)	STR277	CPX104	dt4	Core-band	0.15	0.06	0.06	54.75	21.9	21.9	20.0462	Petrone et al. (2018)
Stromboli	Post-Pizzo	Fe-Mg in cpx	Dimanov & Sautter (2000)	STR277	CPX101	dt4	Inner rim-band	0.22	0.07	0.07	80.3	25.55	25.55	40.9514	Petrone et al. (2018)
Stromboli	Post-Pizzo	Fe-Mg in cpx	Dimanov & Sautter (2000)	STR277	CPX14	dt1+2	Core-band-rim	0.767	0.462835	0.462835	279.955	168.935	168.935	5.24059	Petrone et al. (2018)
Stromboli	Post-Pizzo	Fe-Mg in cpx	Dimanov & Sautter (2000)	STR277	CPX21	dt2	Band-rim	1.26	0.69	0.69	459.9	251.85	251.85	5.8146	Petrone et al. (2018)
Stromboli	Post-Pizzo	Fe-Mg in cpx	Dimanov & Sautter (2000)	STR277	CPX21	dt1+2	Core-band-rim	1.28	0.690412	0.690412	467.2	252	252	143.33	Petrone et al. (2018)
Stromboli	Post-Pizzo	Fe-Mg in cpx	Dimanov & Sautter (2000)	STR277	CPX10	dt2	Band	13.3	4.3	4.3	4854.5	1569.5	1569.5	0.238486	Petrone et al. (2018)
Stromboli	Post-Pizzo	Fe-Mg in cpx	Dimanov & Sautter (2000)	STR277	CPX6	dt2	Band-rim	19.8	9.2	9.2	7227	3358	3358	0.441015	Petrone et al. (2018)
Stromboli	Post-Pizzo	Fe-Mg in cpx	Dimanov & Sautter (2000)	STR277	CPX10	dt1+2	Core-band-rim	43	14.352	14.352	15695	5238.48	5238.48	0.12356	Petrone et al. (2018)
Vesuvius	1944	Fe-Mg in cpx	Dimanov & Sautter (2000)		bl2531		Rim	0.4	0.27	0.18	146	98.55	65.7		Morgan et al. (2004)
Vesuvius	1944	Fe-Mg in cpx	Dimanov & Sautter (2000)		bl2121		Rim	0.51	0.35	0.23	186.15	127.75	83.95	4.85795	Morgan et al. (2004)
Vesuvius	1944	Fe-Mg in cpx	Dimanov & Sautter (2000)		bl2351		Rim	0.59	0.4	0.27	215.35	146	98.55	6.67969	Morgan et al. (2004)
Vesuvius	1944	Fe-Mg in cpx	Dimanov & Sautter (2000)		bl2721		Rim	0.59	0.41	0.27	215.35	149.65	98.55	→∞	Morgan et al. (2004)
Vesuvius	1944	Fe-Mg in cpx	Dimanov & Sautter (2000)		bl2342		Rim	0.6	0.41	0.27	219	149.65	98.55	53.4375	Morgan et al. (2004)
Vesuvius	1944	Fe-Mg in cpx	Dimanov & Sautter (2000)		bl2611		Rim	0.73	0.5	0.33	266.45	182.5	120.45	4.11058	Morgan et al. (2004)
Vesuvius	1944	Fe-Mg in cpx	Dimanov & Sautter (2000)		bl2421		Rim	0.75	0.52	0.34	273.75	189.8	124.1	26.7187	Morgan et al. (2004)
Vesuvius	1944	Fe-Mg in cpx	Dimanov & Sautter (2000)		bl2621		Rim	1.02	0.7	0.47	372.3	255.5	171.55	1.97917	Morgan et al. (2004)
Vesuvius	1944	Fe-Mg in cpx	Dimanov & Sautter (2000)		bl2331		Rim	1.12	0.77	0.51	408.8	281.05	186.15	5.34375	Morgan et al. (2004)
Vesuvius	1944	Fe-Mg in cpx	Dimanov & Sautter (2000)		bl2131		Rim	1.68	1.15	0.76	613.2	419.75	277.4	0.954241	Morgan et al. (2004)
Vesuvius	1944	Fe-Mg in cpx	Dimanov & Sautter (2000)		bl2722		Rim	1.99	1.36	0.9	726.35	496.4	328.5	1.72379	Morgan et al. (2004)
Vesuvius	1944	Fe-Mg in cpx	Dimanov & Sautter (2000)		bl2731		Rim	2.09	1.43	0.95	762.85	521.95	346.75	5.34375	Morgan et al. (2004)
Vesuvius	1944	Fe-Mg in cpx	Dimanov & Sautter (2000)		bl2711		Rim	2.47	1.69	1.12	901.55	616.85	408.8	1.40625	Morgan et al. (2004)
Vesuvius	1944	Fe-Mg in cpx	Dimanov & Sautter (2000)		bl2511		Rim	4.07	2.79	1.85	1485.55	1018.35	675.25	0.333984	Morgan et al. (2004)
Vesuvius	1944	Fe-Mg in cpx	Dimanov & Sautter (2000)		bl2311		Rim	4.58	3.14	2.08	1671.7	1146.1	759.2	1.04779	Morgan et al. (2004)
Vesuvius	1944	Fe-Mg in cpx	Dimanov & Sautter (2000)		bl2521		Rim	8.95	6.14	4.07	3266.75	2241.1	1485.55	0.122283	Morgan et al. (2004)
Long Valley	Bishop Tuff	Fe-Mg in opx	Allan et al. (2013)#	BP126		O23-RHS	Rim	22.496	22.496	11.248					Chamberlain et al. (2014)
Long Valley	Bishop Tuff	Fe-Mg in opx	Allan et al. (2013)#	BP126		O24	Rim	33.6688	33.6688	16.8344				7.80626	Chamberlain et al. (2014)
Long Valley	Bishop Tuff	Fe-Mg in opx	Allan et al. (2013)#	BP126		O24-2	Rim	39.0455	39.0455	19.5228				16.2211	Chamberlain et al. (2014)
Long Valley	Bishop Tuff	Fe-Mg in opx	Allan et al. (2013)#	BP126		O23-LHS	Rim	44.2312	44.2312	22.1156				16.8189	Chamberlain et al. (2014)
Long Valley	Bishop Tuff	Fe-Mg in opx	Allan et al. (2013)#	BP129		O32	Rim	78.609	78.609	39.3045				2.53702	Chamberlain et al. (2014)
Long Valley	Bishop Tuff	Fe-Mg in opx	Allan et al. (2013)#	BP129		O14	Rim	98.4256	98.4256	49.2128				4.40123	Chamberlain et al. (2014)
Long Valley	Bishop Tuff	Fe-Mg in opx	Allan et al. (2013)#	BP115		O3	Rim	126.77	126.77	63.385				3.07706	Chamberlain et al. (2014)
Long Valley	Bishop Tuff	Fe-Mg in opx	Allan et al. (2013)#	BP220		O20	Rim	127.157	127.157	63.5784				225.477	Chamberlain et al. (2014)
Long Valley	Bishop Tuff	Fe-Mg in opx	Allan et al. (2013)#	BP220		O17-LHS	Rim	182.427	182.427	91.2135				1.57802	Chamberlain et al. (2014)
Long Valley	Bishop Tuff	Fe-Mg in opx	Allan et al. (2013)#	BP015		O14-OUTER	Rim	207.028	207.028	103.514				3.54526	Chamberlain et al. (2014)
Long Valley	Bishop Tuff	Fe-Mg in opx	Allan et al. (2013)#	BP124		O21	Rim	208.506	208.506	104.253				59.007	Chamberlain et al. (2014)
Long Valley	Bishop Tuff	Fe-Mg in opx	Allan et al. (2013)#	BP124		O29_1	Rim	240.67	240.67	120.335				2.71165	Chamberlain et al. (2014)
Long Valley	Bishop Tuff	Fe-Mg in opx	Allan et al. (2013)#	BP129		O28	Rim	308.766	308.766	154.383				1.2808	Chamberlain et al. (2014)
Long Valley	Bishop Tuff	Fe-Mg in opx	Allan et al. (2013)#	BP015		O14	Rim	392.083	392.083	196.041				1.04681	Chamberlain et al. (2014)
Long Valley	Bishop Tuff	Fe-Mg in opx	Allan et al. (2013)#	BP115		O8	Rim	440.916	440.916	220.458				1.78602	Chamberlain et al. (2014)
Long Valley	Bishop Tuff	Fe-Mg in opx	Allan et al. (2013)#	BP115		O27	Rim	485.638	485.638	242.819				1.9502	Chamberlain et al. (2014)
Long Valley	Bishop Tuff	Fe-Mg in opx	Allan et al. (2013)#	BP016		O11	Rim	494.06	494.06	247.03				10.3567	Chamberlain et al. (2014)
Long Valley	Bishop Tuff	Fe-Mg in opx	Allan et al. (2013)#	BP016		O30	Rim	495.348	495.348	247.674				67.6722	Chamberlain et al. (2014)
Long Valley	Bishop Tuff	Fe-Mg in opx	Allan et al. (2013)#	BP129		O21	Rim	507.219	507.219	253.61				7.34724	Chamberlain et al. (2014)
Long Valley	Bishop Tuff	Fe-Mg in opx	Allan et al. (2013)#	BP220		O6	Rim	531.191	531.191	265.596				3.63825	Chamberlain et al. (2014)
Long Valley	Bishop Tuff	Fe-Mg in opx	Allan et al. (2013)#	BP016		O6	Rim	560.708	560.708	280.354				2.9549	Chamberlain et al. (2014)
Long Valley	Bishop Tuff	Fe-Mg in opx	Allan et al. (2013)#	BP016		O25	Rim	566.305	566.305	283.153				15.5806	Chamberlain et al. (2014)
Long Valley	Bishop Tuff	Fe-Mg in opx	Allan et al. (2013)#	BP115		O1	Rim	629.786	629.786	314.893				1.37391	Chamberlain et al. (2014)
Long Valley	Bishop Tuff	Fe-Mg in opx	Allan et al. (2013)#	BP115		O23	Rim	644.445	644.445	322.222				5.95004	Chamberlain et al. (2014)
Long Valley	Bishop Tuff	Fe-Mg in opx	Allan et al. (2013)#	BP124		O19	Rim	786.218	786.218	393.109				0.615187	Chamberlain et al. (2014)
Long Valley	Bishop Tuff	Fe-Mg in opx	Allan et al. (2013)#	BP220		O15	Rim	850.427	850.427	425.214				1.35834	Chamberlain et al. (2014)
Long Valley	Bishop Tuff	Fe-Mg in opx	Allan et al. (2013)#	BP129		O37	Rim	872.558	872.558	436.279				3.94096	Chamberlain et al. (2014)
Long Valley	Bishop Tuff	Fe-Mg in opx	Allan et al. (2013)#	BP209		O5	Rim	993.419	993.419	496.709				0.721633	Chamberlain et al. (2014)
Long Valley	Bishop Tuff	Fe-Mg in opx	Allan et al. (2013)#	BP124		O29_2	Rim	1042.74	1042.74	521.371				1.76827	Chamberlain et al. (2014)
Long Valley	Bishop Tuff	Fe-Mg in opx	Allan et al. (2013)#	BP126		O39	Rim	1096.04	1096.04	548.019				1.63648	Chamberlain et al. (2014)
Long Valley	Bishop Tuff	Fe-Mg in opx	Allan et al. (2013)#	BP016		O23	Rim	1137.87	1137.87	568.934				2.08501	Chamberlain et al. (2014)
Long Valley	Bishop Tuff	Fe-Mg in opx	Allan et al. (2013)#	BP129		O35	Rim	1391.27	1391.27	695.636				0.344183	Chamberlain et al. (2014)
Long Valley	Bishop Tuff	Fe-Mg in opx	Allan et al. (2013)#	BP170		O11	Rim	1454.69	1454.69	727.346				1.37525	Chamberlain et al. (2014)
Long Valley	Bishop Tuff	Fe-Mg in opx	Allan et al. (2013)#	BP209		O23	Rim	1959.39	1959.39	979.694				0.172811	Chamberlain et al. (2014)
Long Valley	Bishop Tuff	Fe-Mg in opx	Allan et al. (2013)#	BP209		O6	Rim	1985.24	1985.24	992.619				3.37408	Chamberlain et al. (2014)
Long Valley	Bishop Tuff	Fe-Mg in opx	Allan et al. (2013)#	BP129		O16	Rim	3162.32	3162.32	1581.16				0.0740964	Chamberlain et al. (2014)
* given uncertainties vary between studies: Eyjafjallajokull, Shishaldin - not specified; Stromboli, Bishop Tuff - 1SD; Laki, Irazu, Vesuvius - 2SD
† timescales for Pankhurst et al. (2018) given as decimal dates
$ timescale density. Events with d<1 are classified as background activity (blue); events with d>1 represent increased activity (red) priming the plumbing system for eruption (referred to in the text as priming duration).
# Correction factor of 225 applied to match Da of Dohmen et al. (2016) at T = 790°C, fO2 = NNO+0.931 (Chamberlain et al., 2014), and XFe= 0.47 (Hildreth, 1977)

## Sheet: G49365
Mangler, M.F., Petrone, C.M., and Prytula, J., 2022, Magma recharge patterns control eruption styles and magnitudes at Popocatépetl volcano (Mexico): Geology, https://doi.org/10.1130/G49365.1
